# Supplementary material for: Optimizing ring-opening polymerization of ε-caprolactone by using aluminum complexes bearing amide as catalysts and their application in synthesizing poly-ε-caprolactone with special initiators and other polycycloesters
Source: Royal Society of Chemistry journal article supplement (doi:10.1039/c5ra21252a), 2015-01-01
Supplement: c5ra21252a1.pdf [file c5ra21252a1.pdf]

# Optimizing Ring-opening Polymerization of $\epsilon$ -Caprolactone by Using Aluminum Complexes Bearing Amide as Catalysts and Their Application in Synthesizing Poly- $\epsilon$ -caprolactone with Special Initiators and Other Polycycloesters

Hsi-Ching Tseng,<sup>a</sup> Fu-Shen Chen,<sup>a</sup> Michael Y. Chiang,<sup>ab</sup> Wei-Yi Lu,<sup>a</sup> Yu-Hsieh Chen,<sup>a</sup> Yi-Chun Lai,<sup>a</sup> Hsuan-Ying Chen<sup>\*a</sup>

<sup>a</sup> Department of Medicinal and Applied Chemistry, Kaohsiung Medical University, Kaohsiung, Taiwan, 80708, R.O.C.

<sup>b</sup> Department of Chemistry, National Sun Yat-sen University, Kaohsiung, Taiwan, 80424, R.O.C.

Table of Contents

**Table S1** Kinetic study of CL polymerization with various Al complexes in toluene 5 mL, [CL] = 2.0 M ..... 2

**Table S2** Kinetic study of CL polymerization with various concentration of **MfOMeAlMe<sub>2</sub>** in toluene 5 mL, [CL] = 2.0 M at room temperature..... 3

**Figure S1-S36** <sup>1</sup>H and <sup>13</sup>C NMR spectra of ligands and associated Al complexes .4-21

**Figure S37** <sup>1</sup>H NMR spectrum of PCL with PEG-200.....22

**Figure S38** <sup>1</sup>H NMR spectrum of PCL with DMAE.....22

**Figure S39** <sup>1</sup>H NMR spectrum of PCL with BHEDS.....23

**Figure S40** <sup>1</sup>H NMR spectrum of PCL with HOSSBr.....23

**Figure S41** <sup>1</sup>H NMR spectrum of PCL with PEGSS.....24

**Figure S42** <sup>1</sup>H NMR spectrum of PVL .....24

**Figure S43** <sup>1</sup>H NMR spectrum of PBrCL .....25

**Table S1** Kinetic study of CL polymerization with various Al complexes in toluene 5

mL, [CL] = 2.0 M at room temperature

| time                   | TsOMe         | TsiPr         | MsOMe          | MsiPr          | TcOMe         | TciPr          | CbOMe         | CbiPr         | MfOMe         |
|------------------------|---------------|---------------|----------------|----------------|---------------|----------------|---------------|---------------|---------------|
| min                    | Conv.(%)      |               |                |                |               |                |               |               |               |
| 5                      |               |               |                |                |               |                |               |               | 8             |
| 10                     | 4             |               | 2              |                |               |                | 10            |               | 23            |
| 13                     |               | 6             |                |                |               |                |               |               |               |
| 15                     |               | 9             |                | 10             |               |                |               | 39            | 39            |
| 17                     |               | 12            |                |                |               |                |               |               |               |
| 20                     | 24            | 16            | 42             | 22             | 19            |                | 20            |               | 50            |
| 25                     |               |               |                | 28             |               |                |               |               | 59            |
| 30                     | 37            |               | 60             | 37.5           |               |                | 43            | 68            |               |
| 35                     |               |               |                |                |               |                |               |               | 74            |
| 40                     |               | 27            | 76             | 52             | 43            |                | 56            | 78            |               |
| 45                     |               |               |                |                |               | 39             |               | 84            | 83            |
| 50                     | 58            |               | 82             | 63             |               |                | 64            | 88            |               |
| 58                     |               |               |                |                |               |                |               | 92            |               |
| 60                     | 65            | 42            | 89             | 74             | 6             | 68             | 69            |               | 91            |
| 70                     | 74            |               | 92             |                |               |                | 78            |               |               |
| 75                     |               |               |                |                |               | 78             |               |               | 95            |
| 80                     | 80            | 52            |                | 86             | 74            |                | 83            |               |               |
| 90                     | 84            |               |                |                |               | 84             | 86            |               |               |
| 100                    | 88            | 62            |                | 92             | 78            | 88             | 89            |               |               |
| 110                    |               |               |                |                |               |                | 93            |               |               |
| 120                    |               | 68            |                |                | 86            | 92             |               |               |               |
| 140                    |               | 74            |                |                | 90            |                |               |               |               |
| 160                    |               | 79            |                |                |               |                |               |               |               |
| 220                    |               | 89            |                |                |               |                |               |               |               |
|                        |               |               |                |                |               |                |               |               |               |
| <b>k<sub>obs</sub></b> | 0.0227<br>(5) | 0.0102<br>(1) | 0.0394<br>(10) | 0.0290<br>(6)  | 0.0173<br>(5) | 0.0263<br>(18) | 0.0248<br>(7) | 0.0471<br>(2) | 0.0422<br>(3) |
| <b>IP</b>              | 9.70<br>(147) | 6.27<br>(96)  | 5.34<br>(116)  | 13.07<br>(109) | 7.12<br>(280) | 20.5<br>(58)   | 8.67<br>(193) | 5.6<br>(18)   | 3.36<br>(26)  |
|                        |               |               |                |                |               |                |               |               |               |
|                        |               |               |                |                |               |                |               |               |               |
|                        |               |               |                |                |               |                |               |               |               |

**Table S2** Kinetic study of CL polymerization with various concentration of

**MfOMeAlMe<sub>2</sub>** in toluene 5 mL, [CL] = 2.0 M at room temperature

| Time | [CL] : [MfOMeAlMe <sub>2</sub> ] : [BnOH] |            |             |             |
|------|-------------------------------------------|------------|-------------|-------------|
|      | 100:0.5: 1                                | 100:1: 2   | 100:1.5: 3  | 100:2: 4    |
| min  | Conv.(%)                                  |            |             |             |
| 3    |                                           |            |             | 0.37        |
| 5    |                                           | 8          | 0.22        | 0.53        |
| 10   |                                           | 23         | 0.4         | 0.73        |
| 13   |                                           |            |             | 0.82        |
| 15   |                                           | 39         | 0.64        | 0.87        |
| 17   |                                           |            |             | 0.89        |
| 18   |                                           |            | 0.72        |             |
| 20   |                                           | 50         | 0.78        |             |
| 25   |                                           | 59         |             |             |
| 30   |                                           |            | 0.93        |             |
| 35   |                                           | 74         |             |             |
| 45   |                                           | 89         |             |             |
| 60   |                                           | 95         |             |             |
| 72   |                                           |            |             |             |
| 120  | 0.11                                      |            |             |             |
| 150  | 0.17                                      |            |             |             |
| 230  | 0.26                                      |            |             |             |
| 290  | 0.3                                       |            |             |             |
| 350  | 0.36                                      |            |             |             |
|      |                                           |            |             |             |
| kobs | 0.0014 (1)                                | 0.0422 (3) | 0.0980 (61) | 0.1257 (34) |
| IP   | 22.91 (1530)                              | 3.36 (26)  | 4.05 (114)  | 0           |

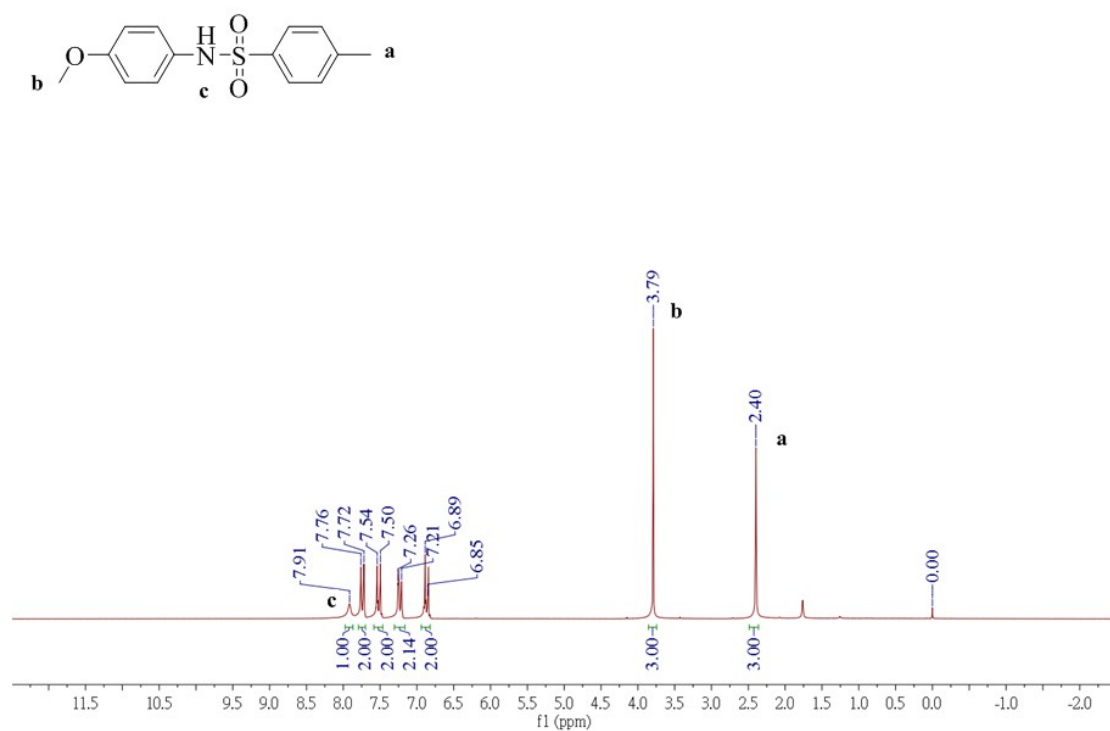

Figure S1  $^1\text{H}$  NMR spectrum of TsOMe-H in  $\text{CDCl}_3$

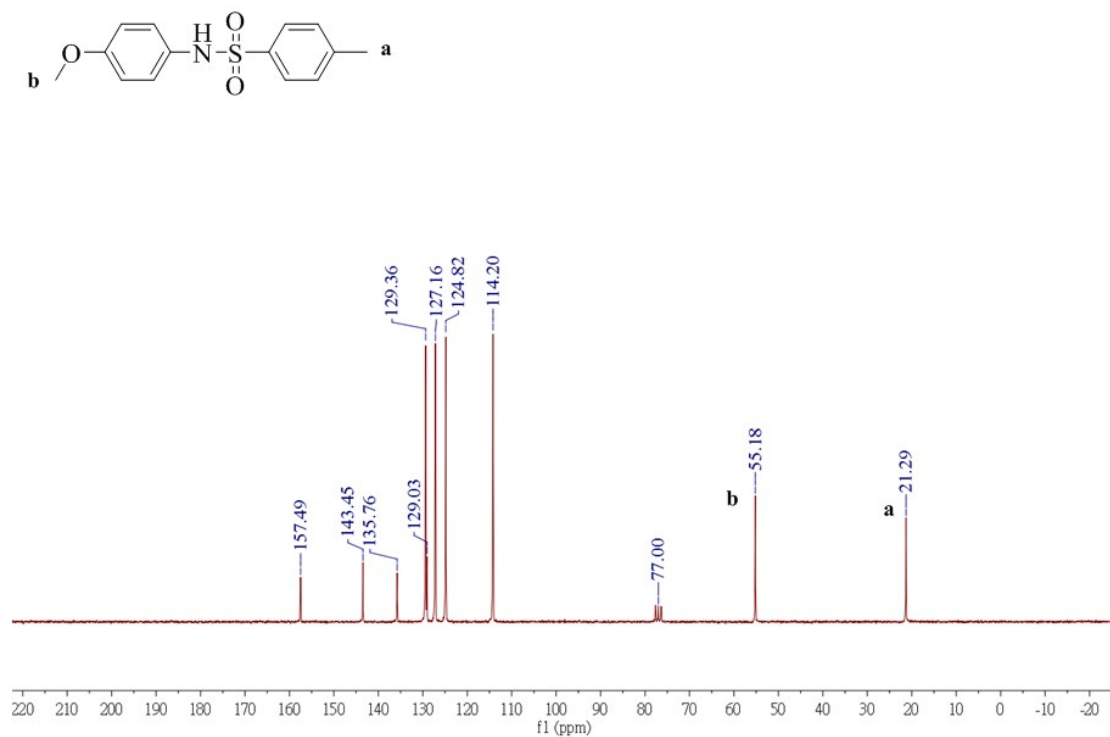

Figure S2  $^{13}\text{C}$  NMR spectrum of TsOMe-H in  $\text{CDCl}_3$

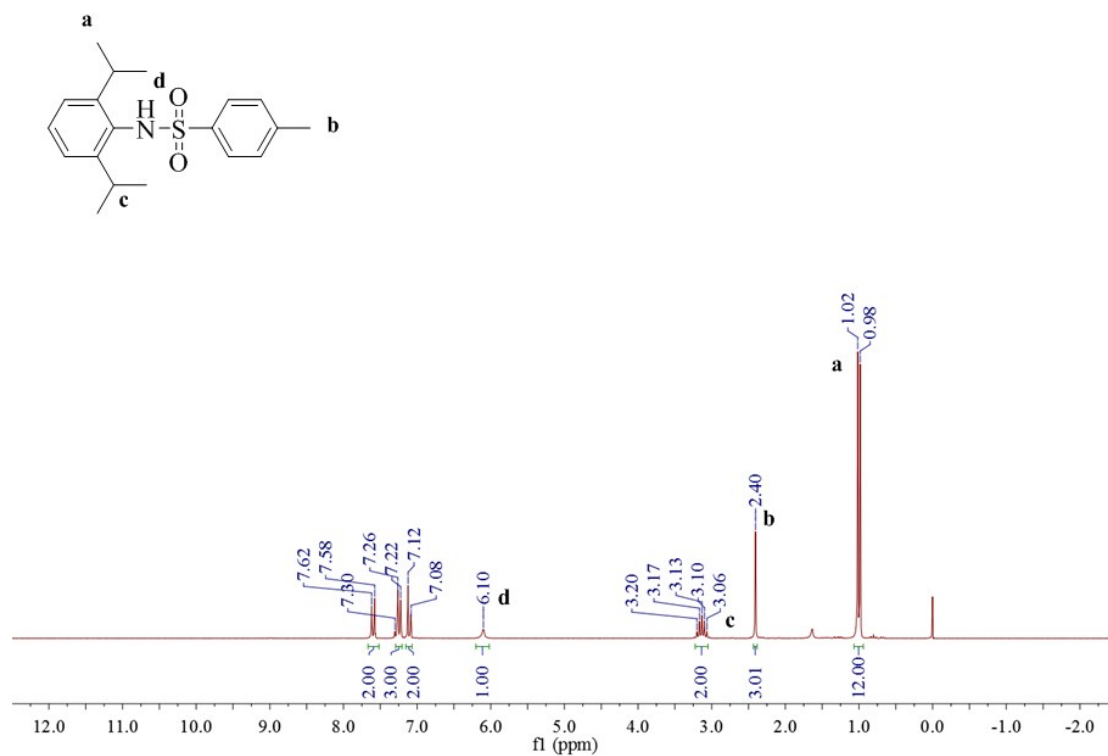

Figure S3 <sup>1</sup>H NMR spectrum of TsiPr-H in CDCl<sub>3</sub>

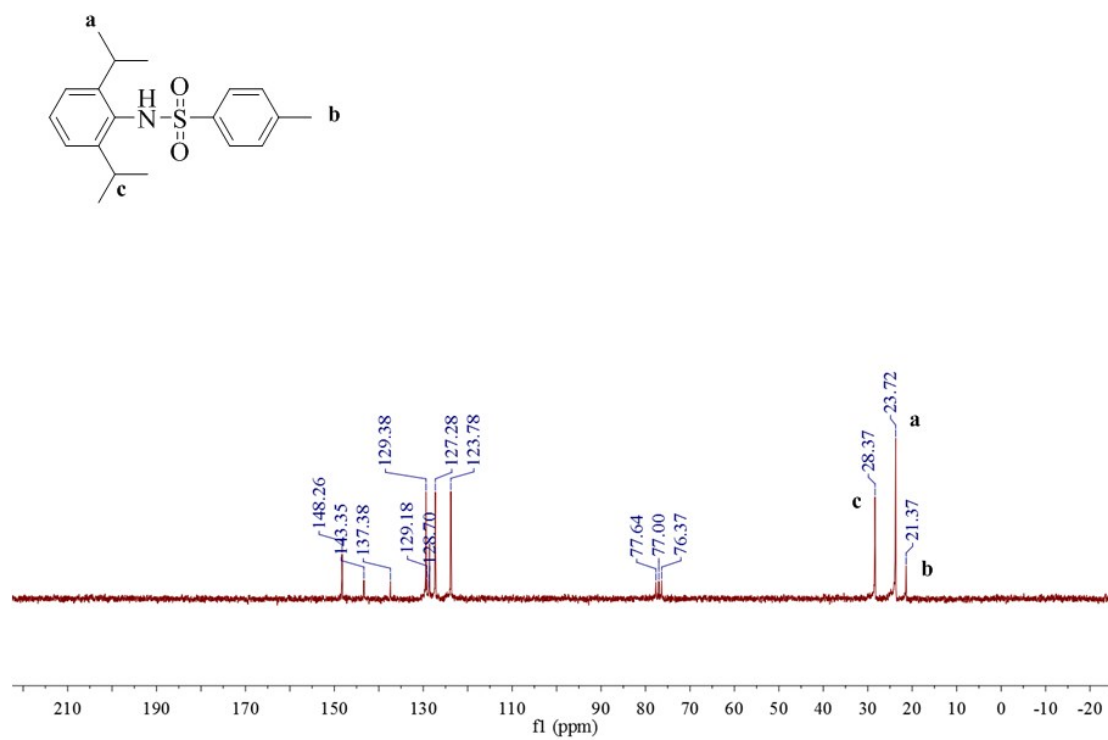

Figure S4 <sup>13</sup>C NMR spectrum of TsiPr-H in CDCl<sub>3</sub>

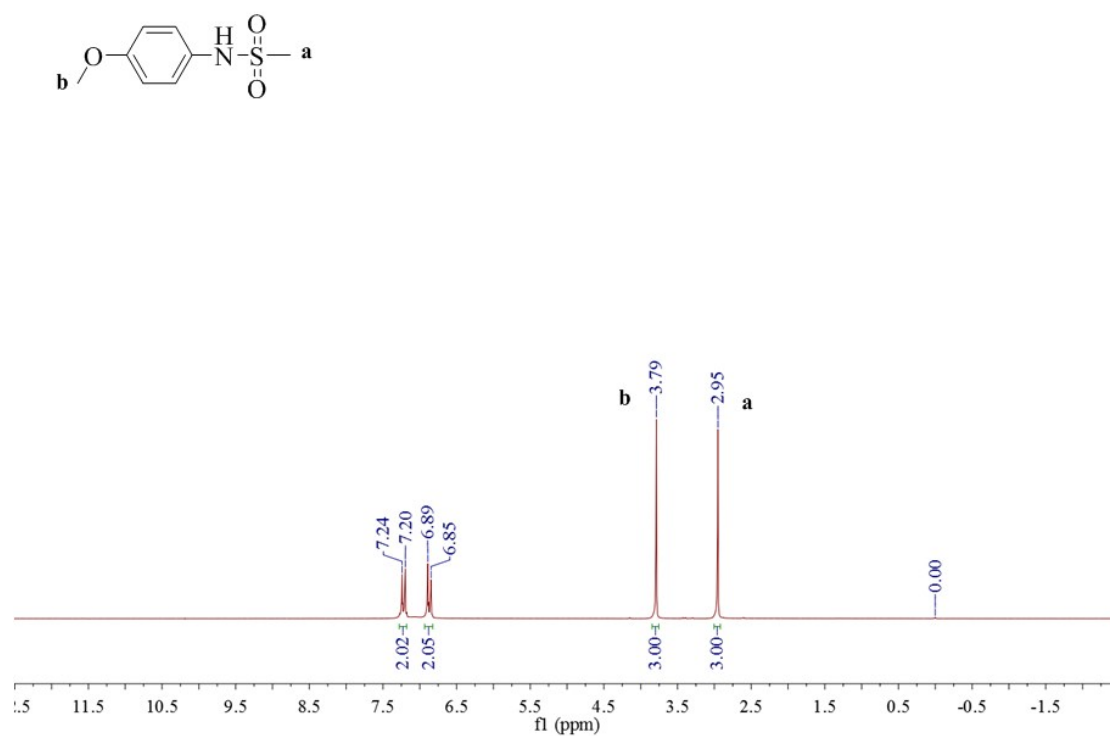

Figure S5  $^1\text{H}$  NMR spectrum of MsOMe-H in CDCl<sub>3</sub>

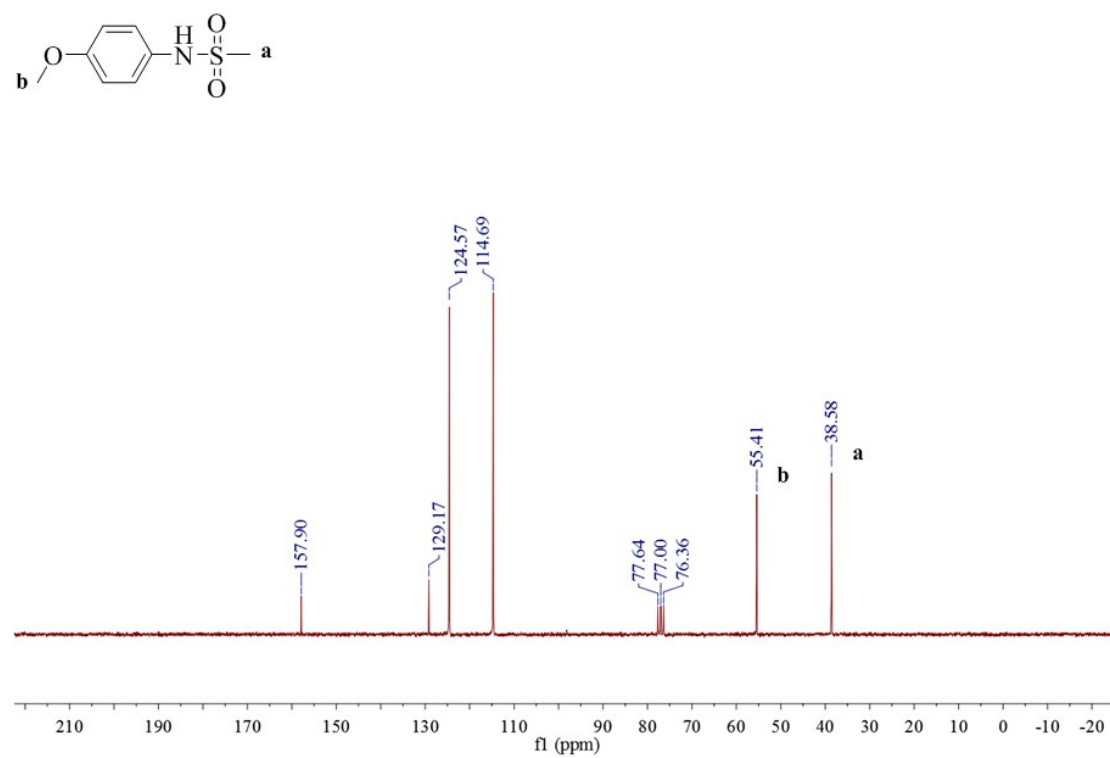

Figure S6  $^{13}\text{C}$  NMR spectrum of MsOMe-H in CDCl<sub>3</sub>

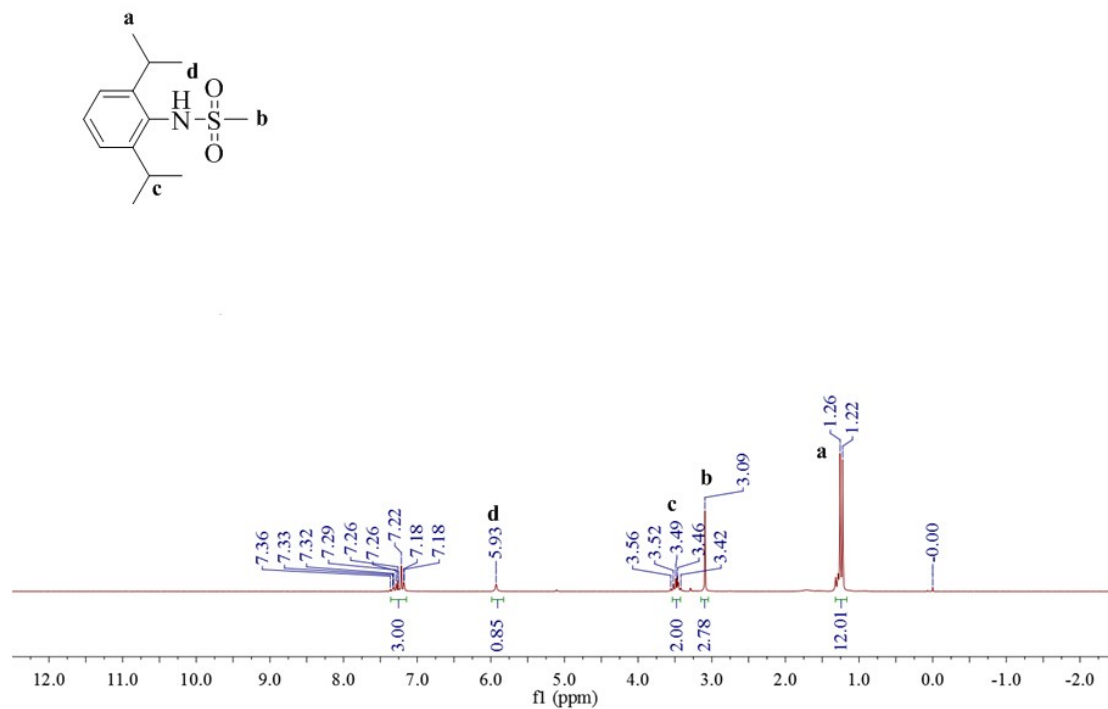

Figure S7 <sup>1</sup>H NMR spectrum of MsiPr-H in CDCl<sub>3</sub>

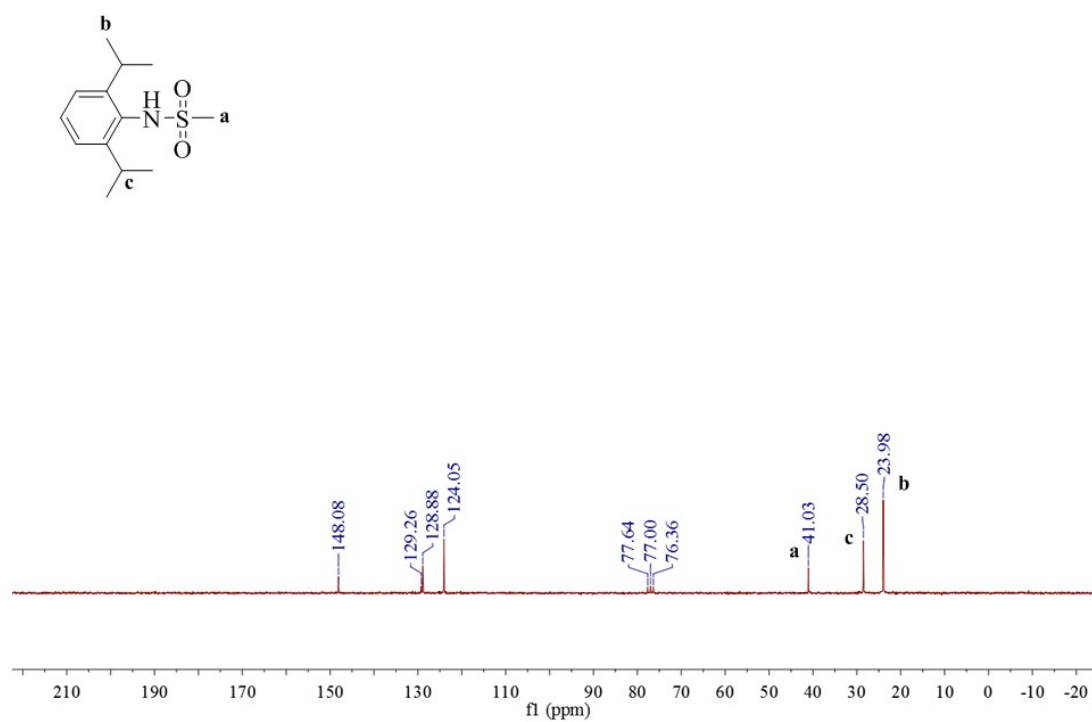

Figure S8 <sup>13</sup>C NMR spectrum of MsiPr-H in CDCl<sub>3</sub>

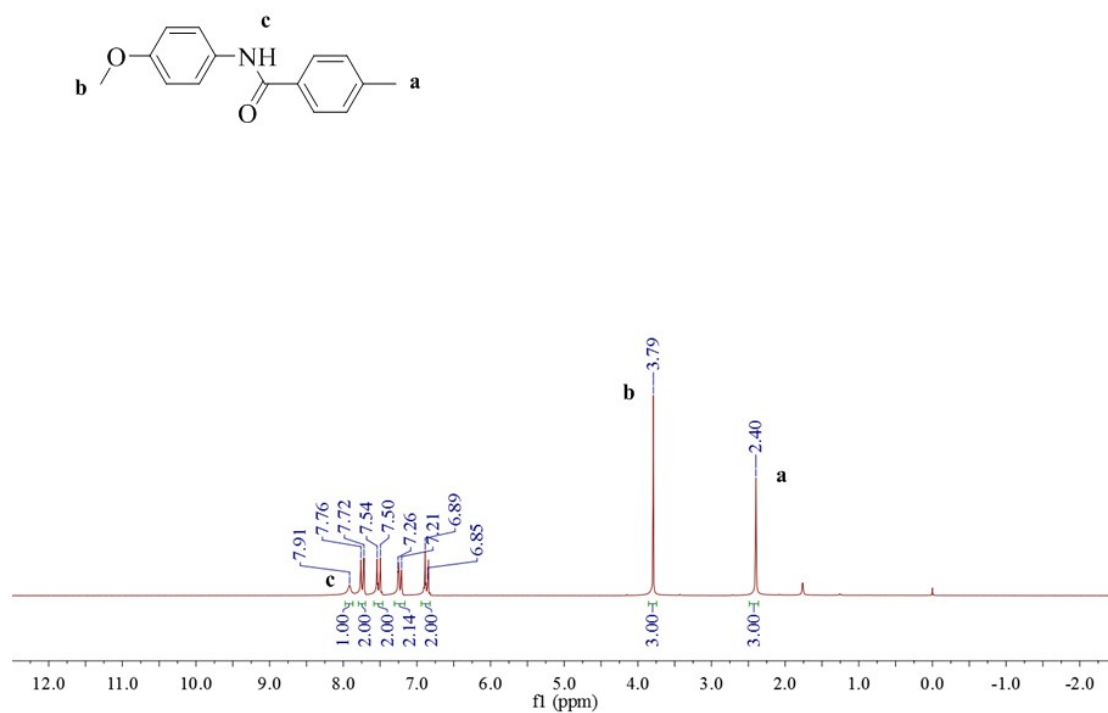

Figure S9  $^1\text{H}$  NMR spectrum of TcOMe-H in CDCl<sub>3</sub>

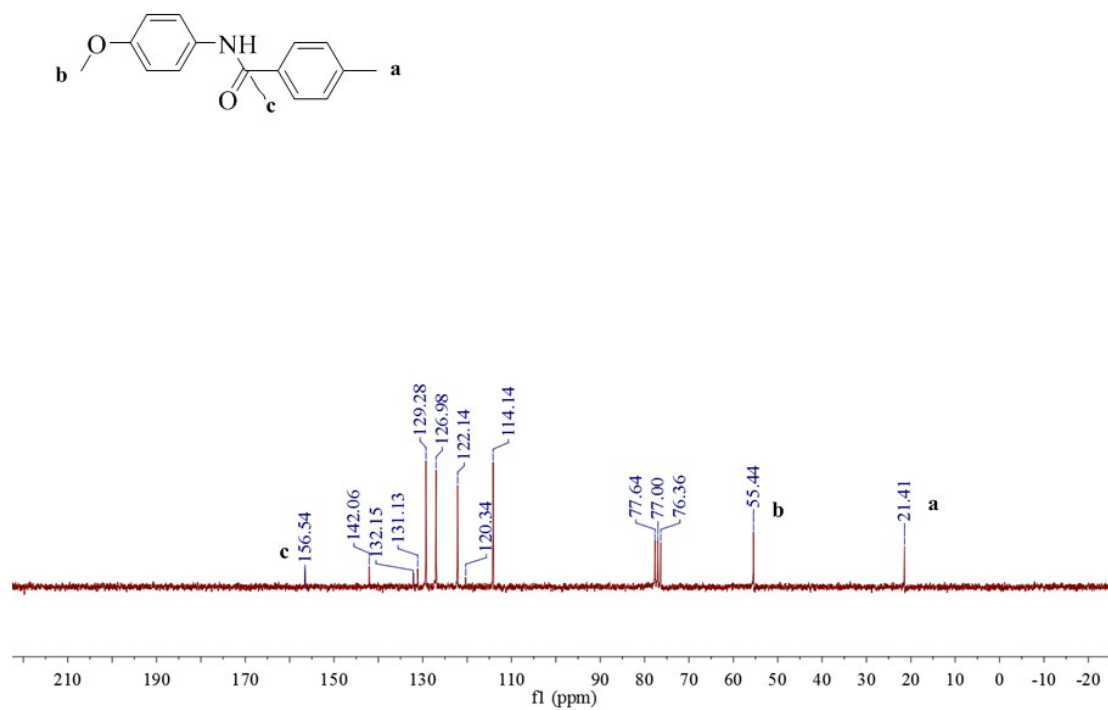

Figure S10  $^{13}\text{C}$  NMR spectrum of TciOMe-H in CDCl<sub>3</sub>



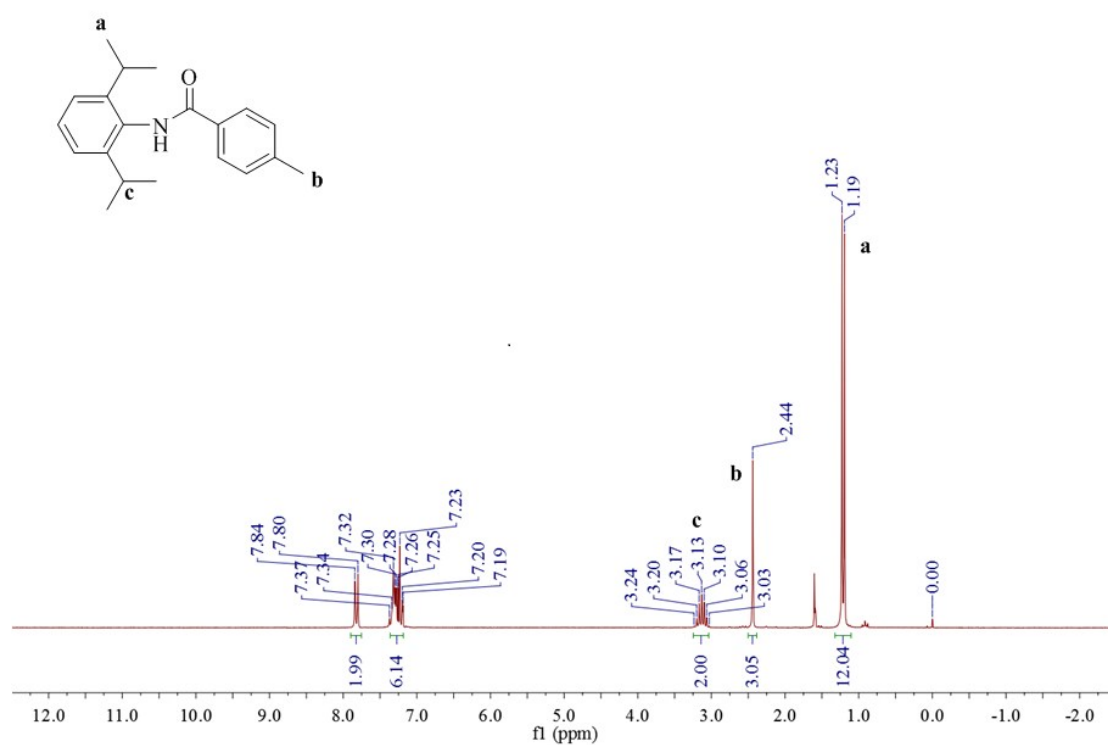

Figure S11  $^1\text{H}$  NMR spectrum of TciPr -H in  $\text{CDCl}_3$

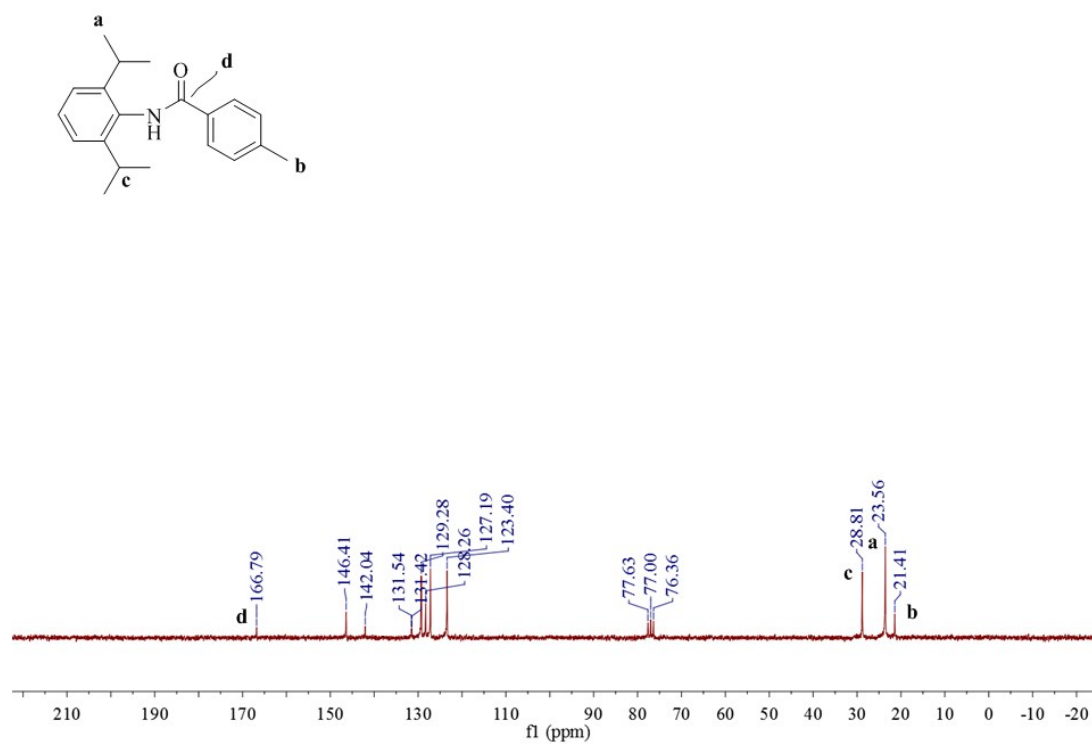

Figure S12  $^{13}\text{C}$  NMR spectrum of TciPr -H in  $\text{CDCl}_3$

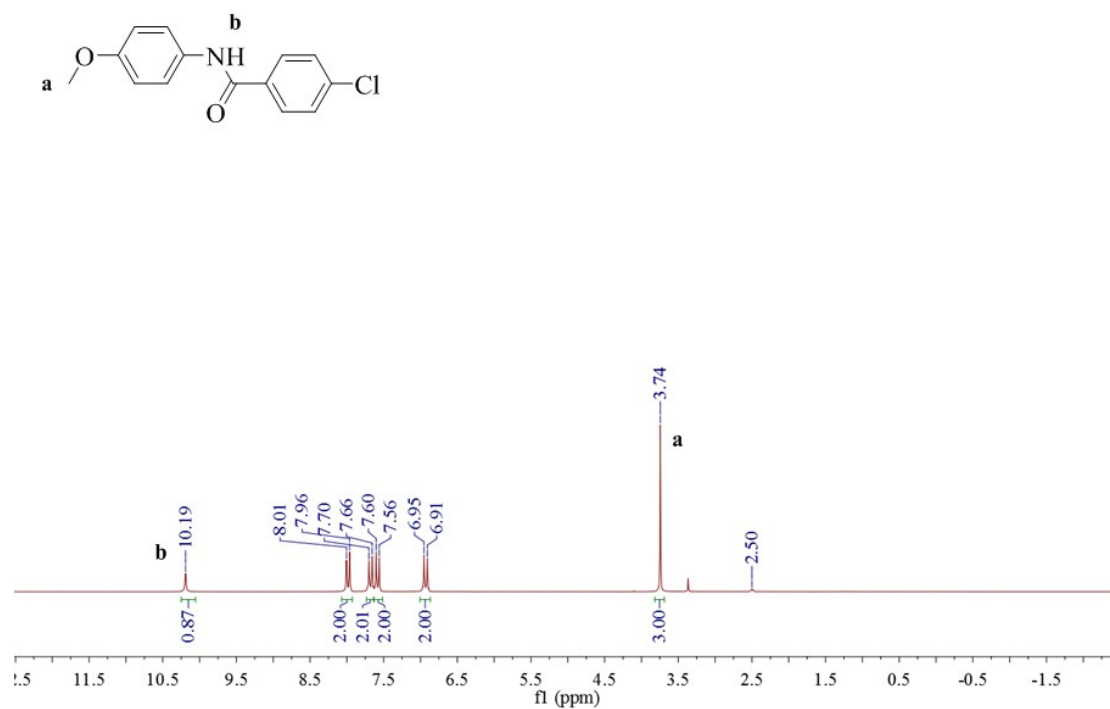

Figure S13  $^1\text{H}$  NMR spectrum of CbOMe-H in d-DMSO

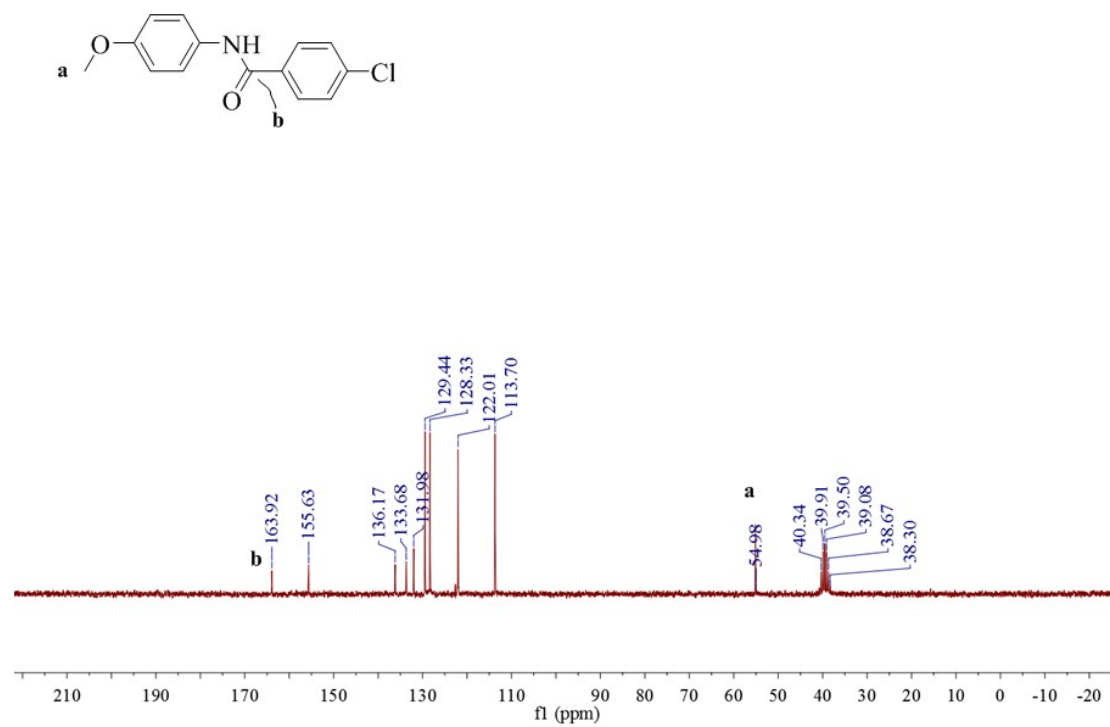

Figure S14  $^{13}\text{C}$  NMR spectrum of CbOMe-H in d-DMSO

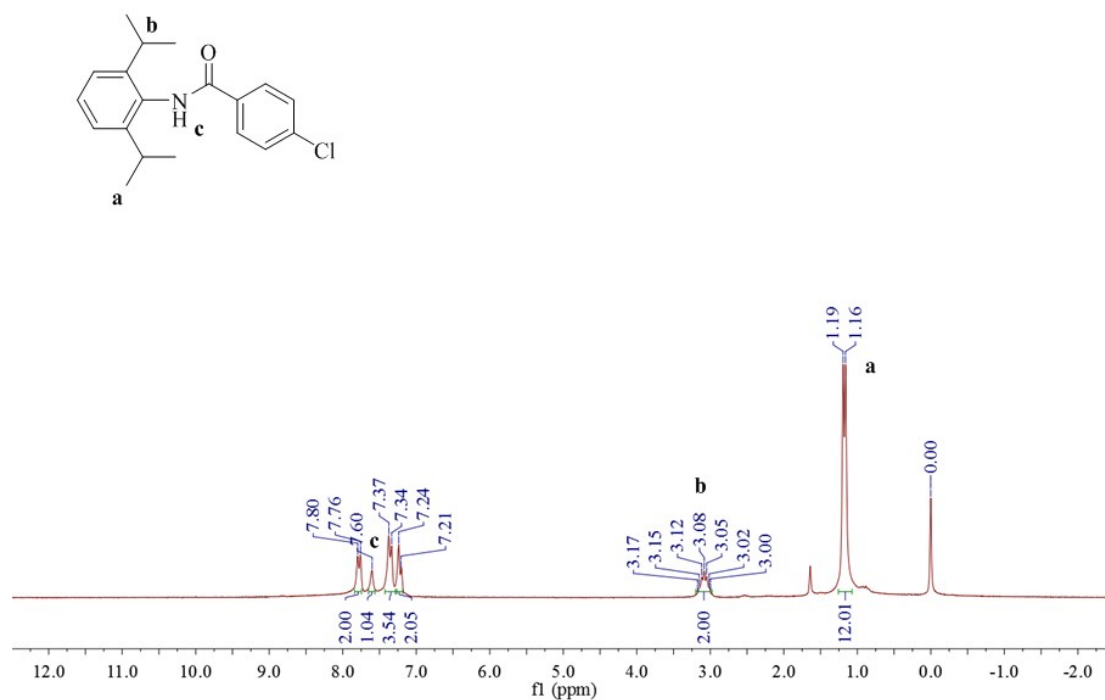

Figure S15 <sup>1</sup>H NMR spectrum of CbiPr-H in CDCl<sub>3</sub>

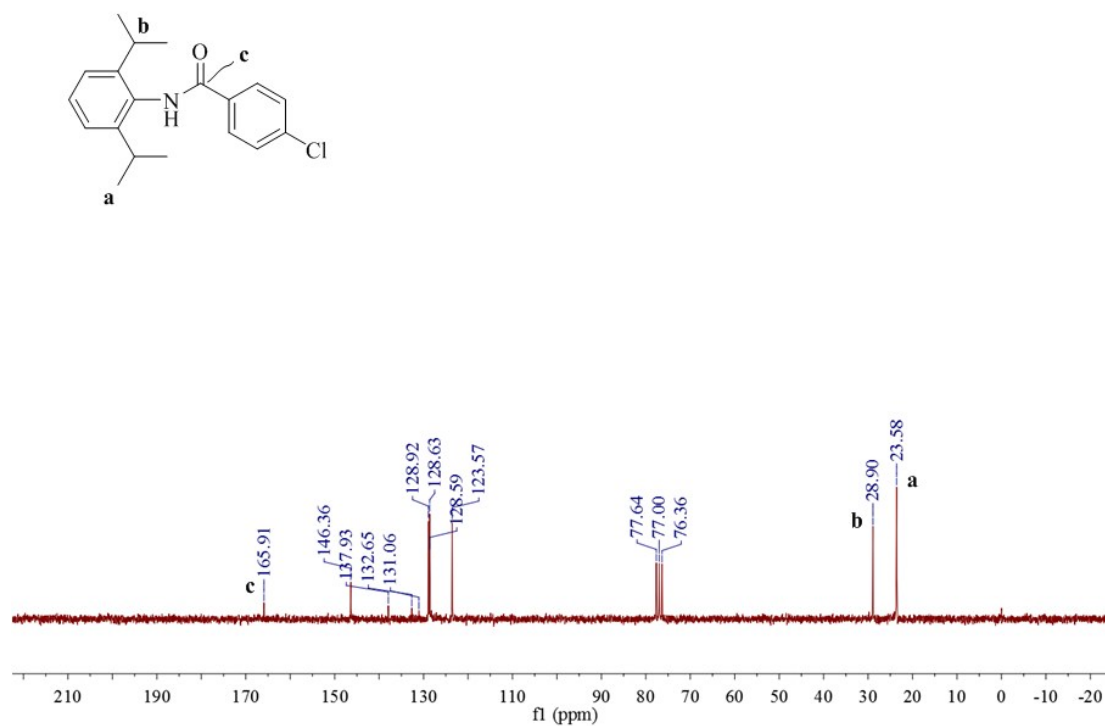

Figure S16 <sup>13</sup>C NMR spectrum of CbiPr-H in CDCl<sub>3</sub>

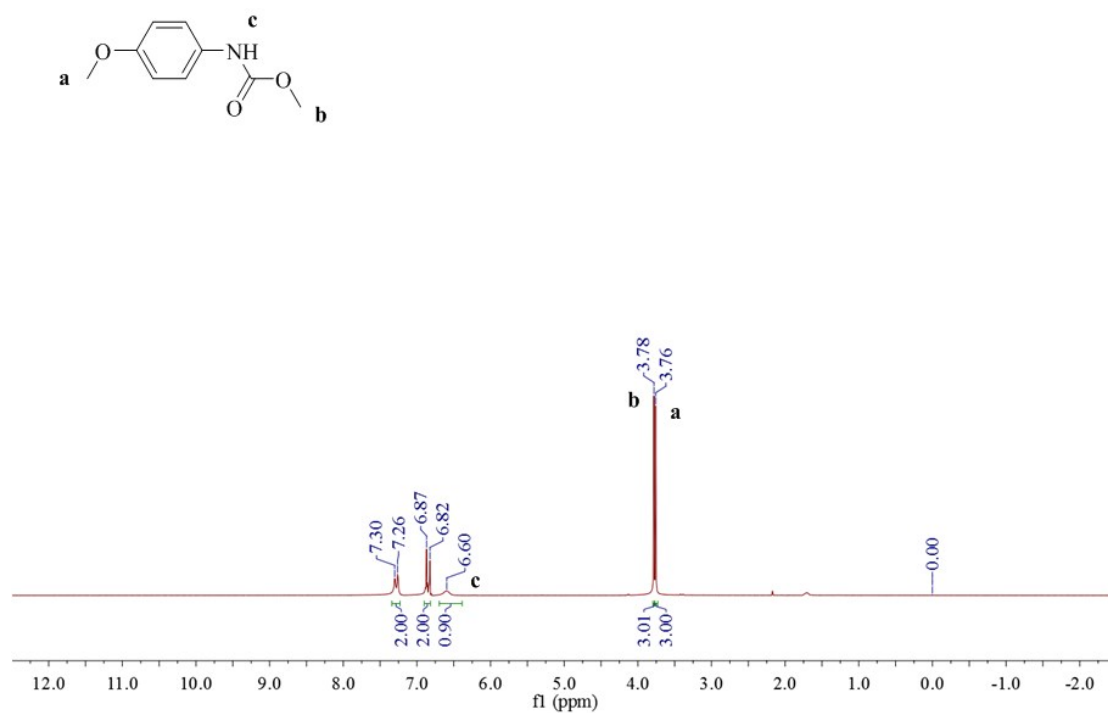

Figure S17  $^1\text{H}$  NMR spectrum of MfOMe-H in  $\text{CDCl}_3$

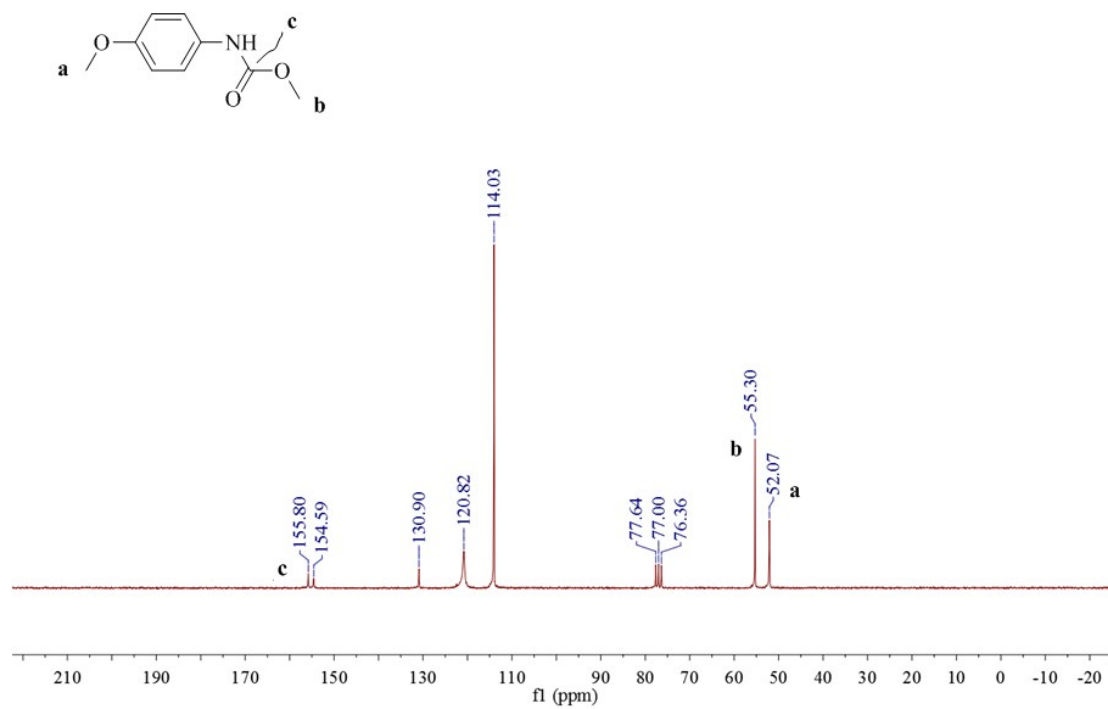

Figure S18  $^{13}\text{C}$  NMR spectrum of MfOMe-H in  $\text{CDCl}_3$

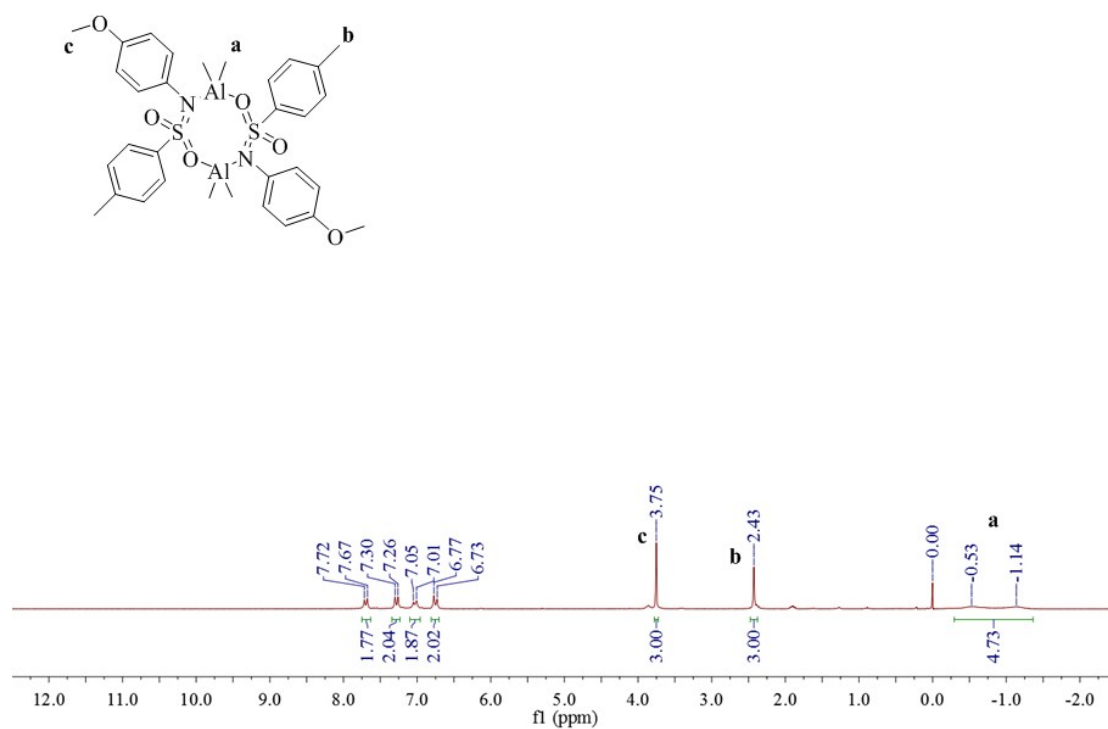

Figure S19 <sup>1</sup>H NMR spectrum of TsOMeAlMe<sub>2</sub> in CDCl<sub>3</sub>

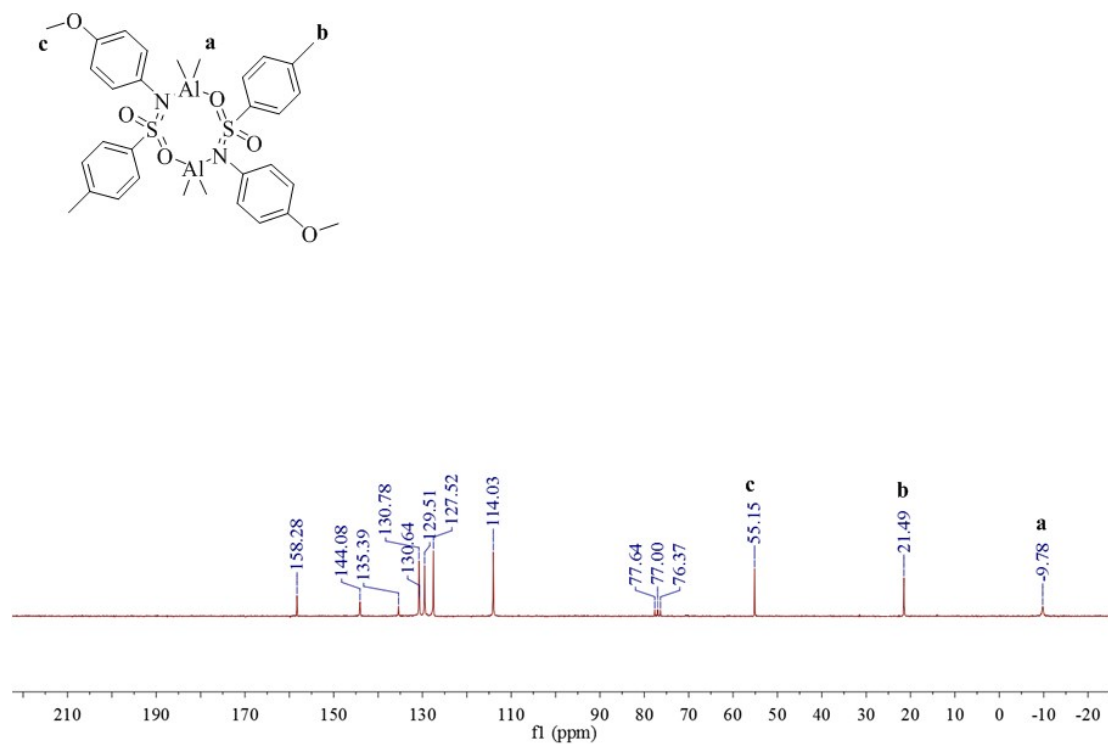

Figure S20 <sup>13</sup>C NMR spectrum of TsOMeAlMe<sub>2</sub> in CDCl<sub>3</sub>

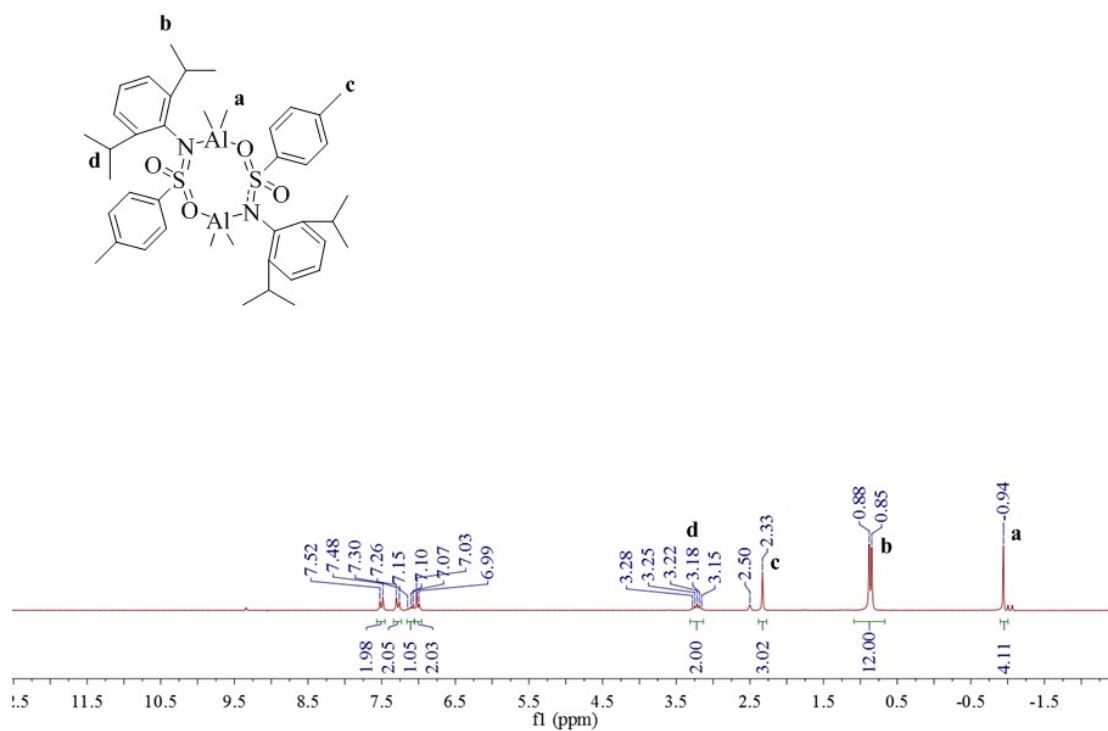

Figure S21  $^1\text{H}$  NMR spectrum of  $\text{TsiPrAlMe}_2$  in d-DMSO

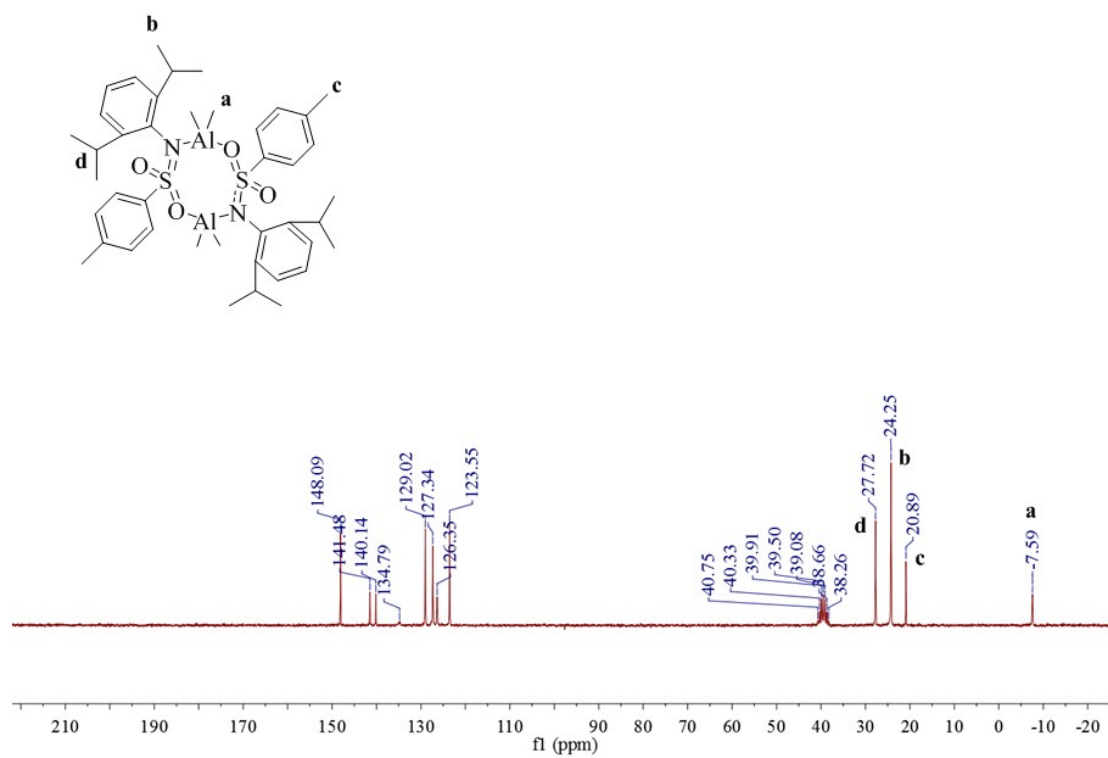

Figure S22  $^{13}\text{C}$  NMR spectrum of  $\text{TsiPrAlMe}_2$  in d-DMSO

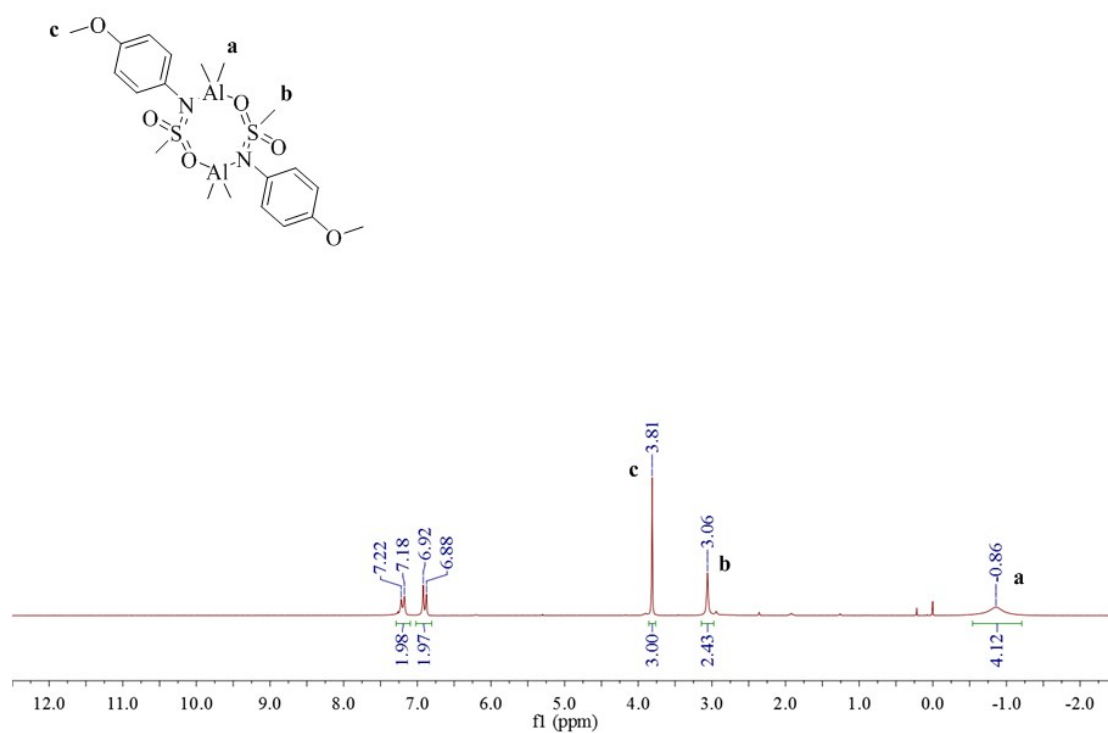

Figure S23 <sup>1</sup>H NMR spectrum of MsOMsAlMe<sub>2</sub> in CDCl<sub>3</sub>

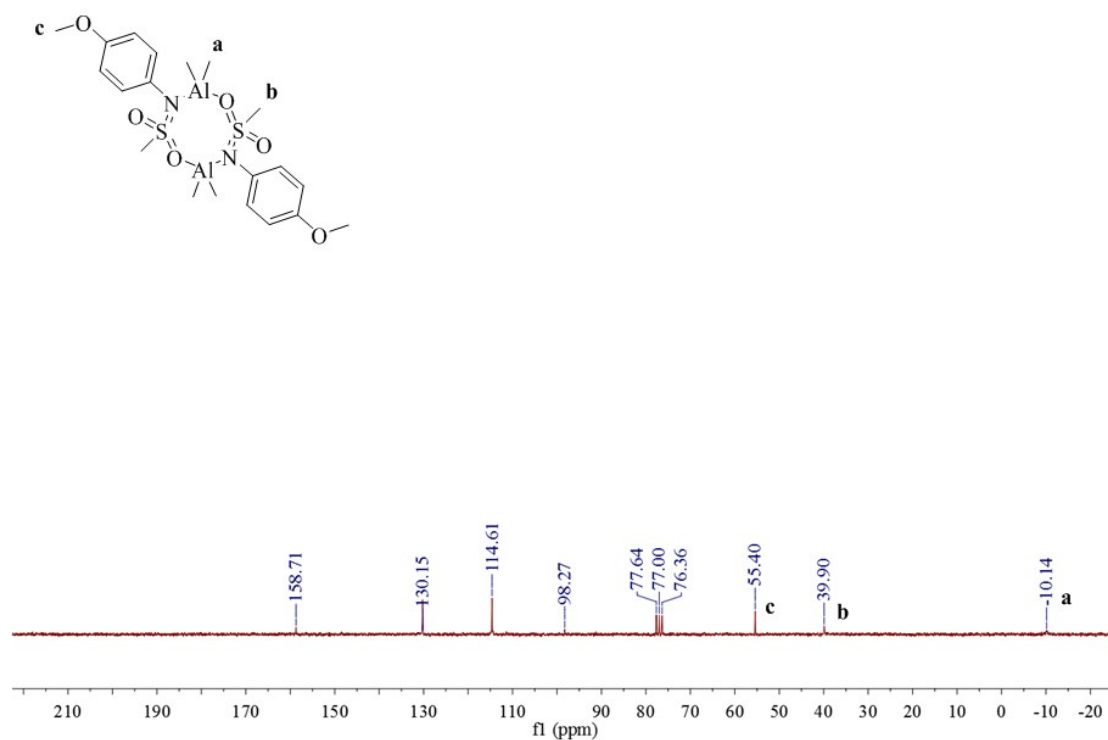

Figure S24 <sup>13</sup>C NMR spectrum of MsOMeAlMe<sub>2</sub> in CDCl<sub>3</sub>

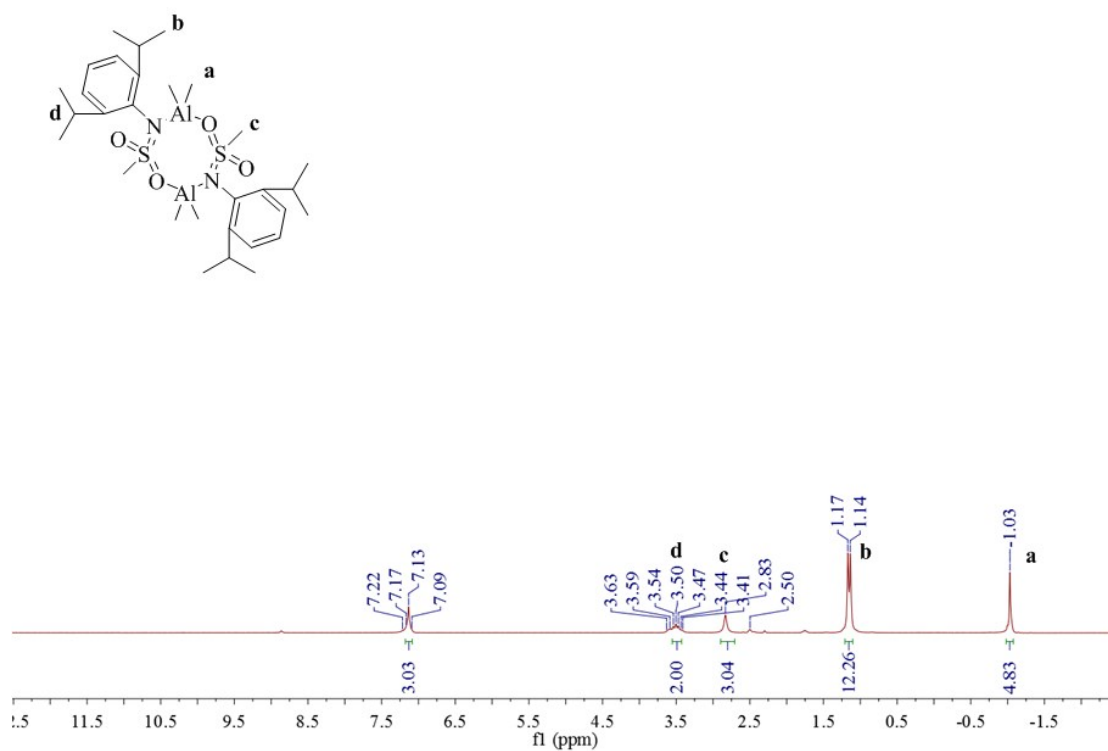

Figure S25 <sup>1</sup>H NMR spectrum of MsiPrAlMe<sub>2</sub> in d-DMSO

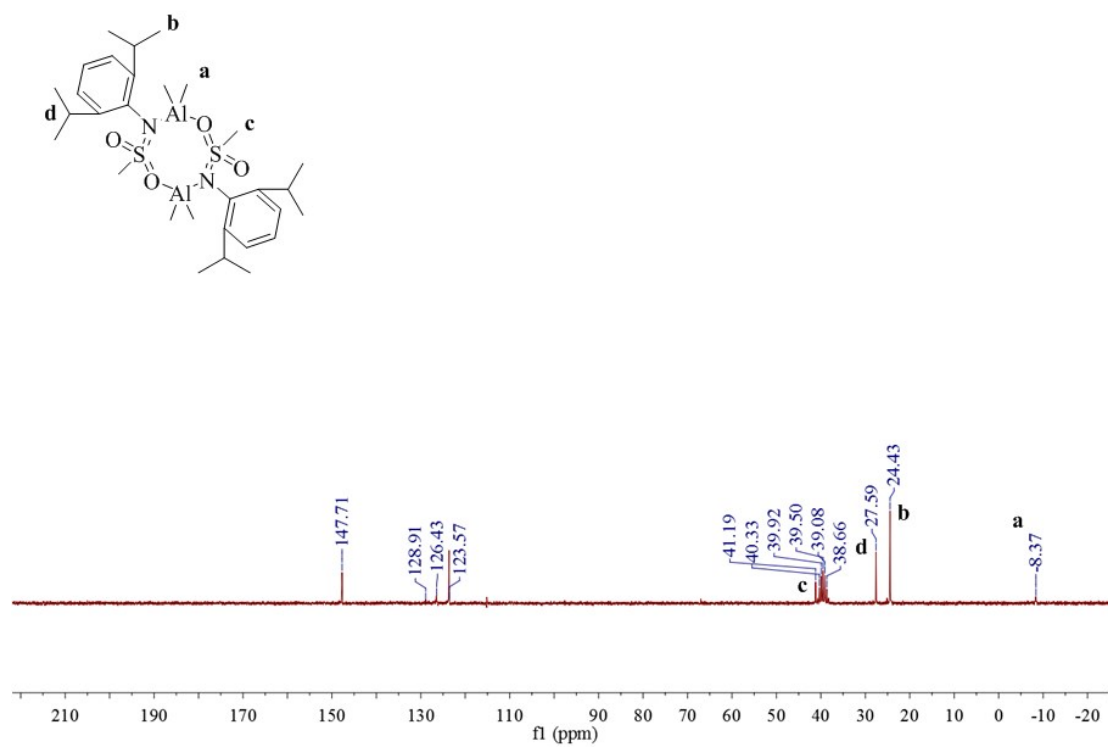

Figure S26 <sup>13</sup>C NMR spectrum of MsiPrAlMe<sub>2</sub> in d-DMSO



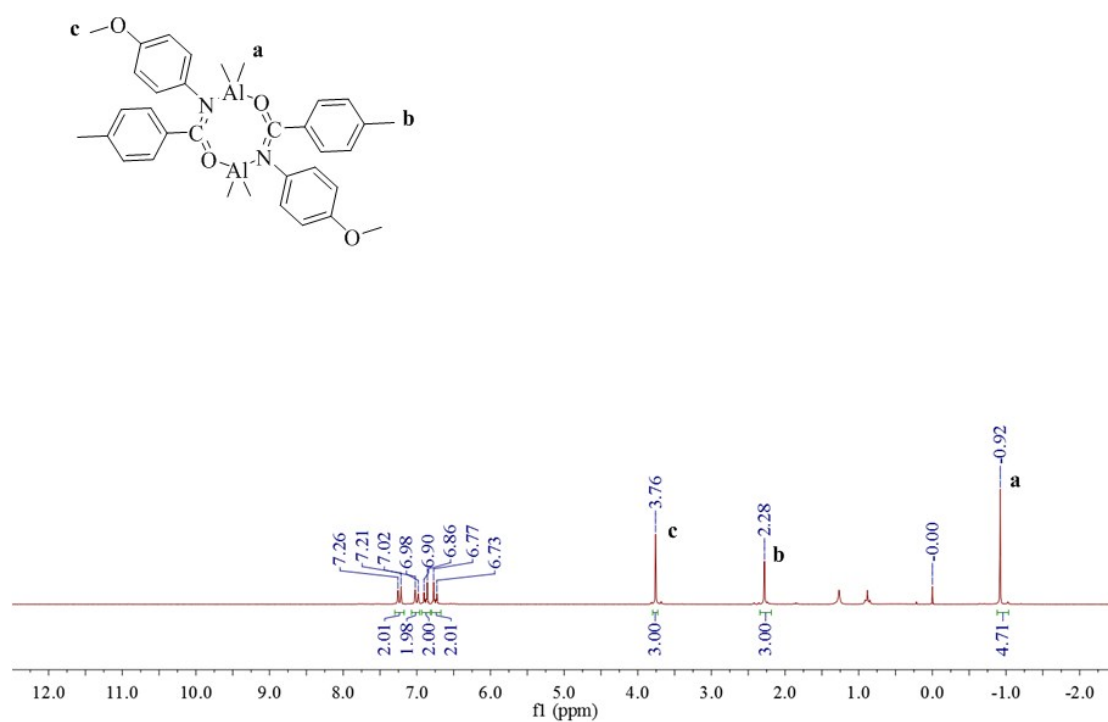

Figure S27 <sup>1</sup>H NMR spectrum of TcOMeAlMe<sub>2</sub> in CDCl<sub>3</sub>

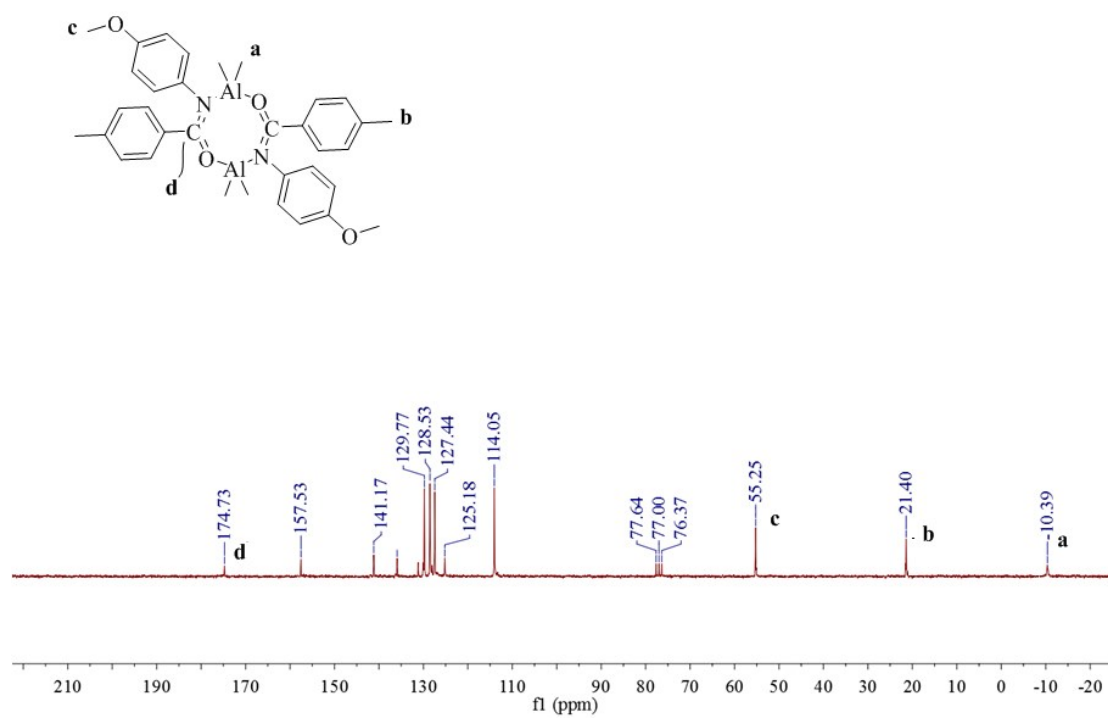

Figure S28 <sup>13</sup>C NMR spectrum of TcOMeAlMe<sub>2</sub> in CDCl<sub>3</sub>

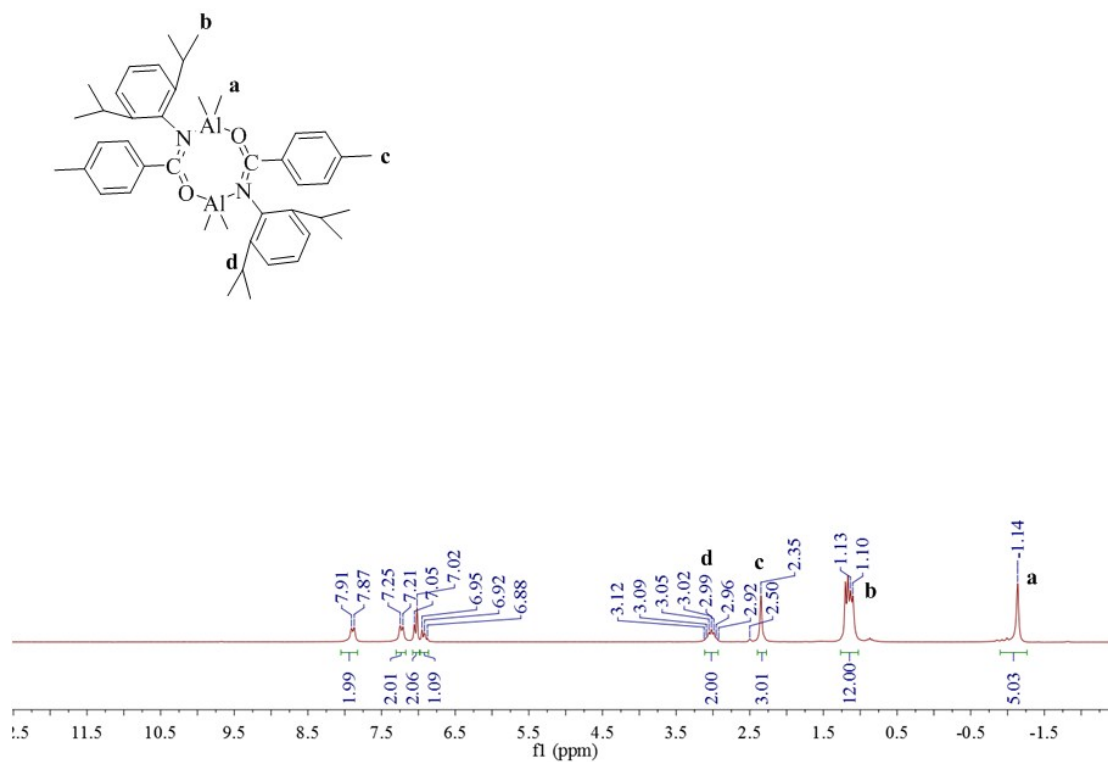

Figure S29  $^1\text{H}$  NMR spectrum of  $\text{TciPrAlMe}_2$  in d-DMSO

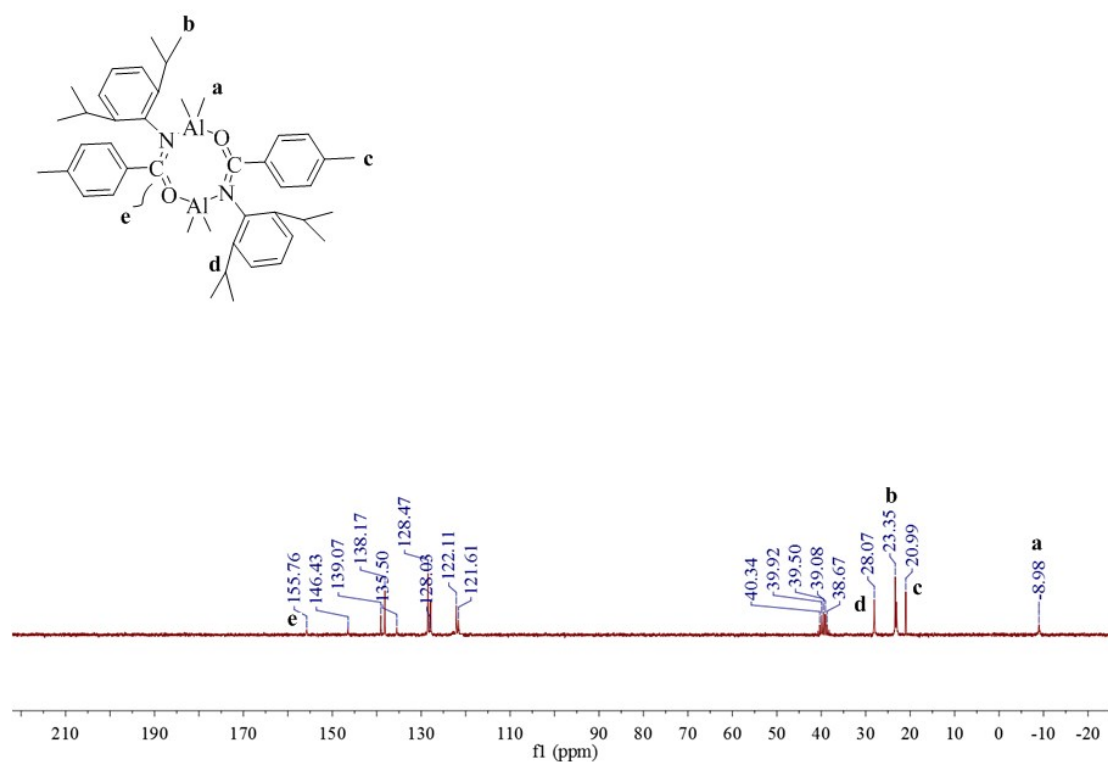

Figure S30  $^{13}\text{C}$  NMR spectrum of  $\text{TciPrAlMe}_2$  in d-DMSO

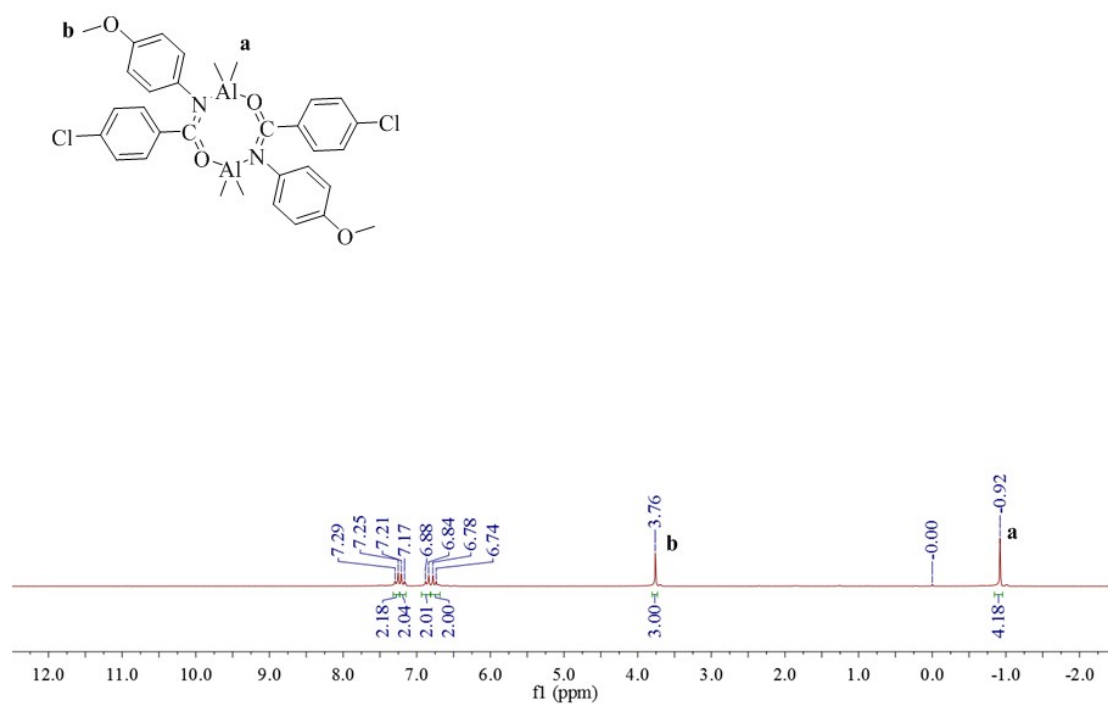

Figure S31 <sup>1</sup>H NMR spectrum of CbOMeAlMe<sub>2</sub> in CDCl<sub>3</sub>

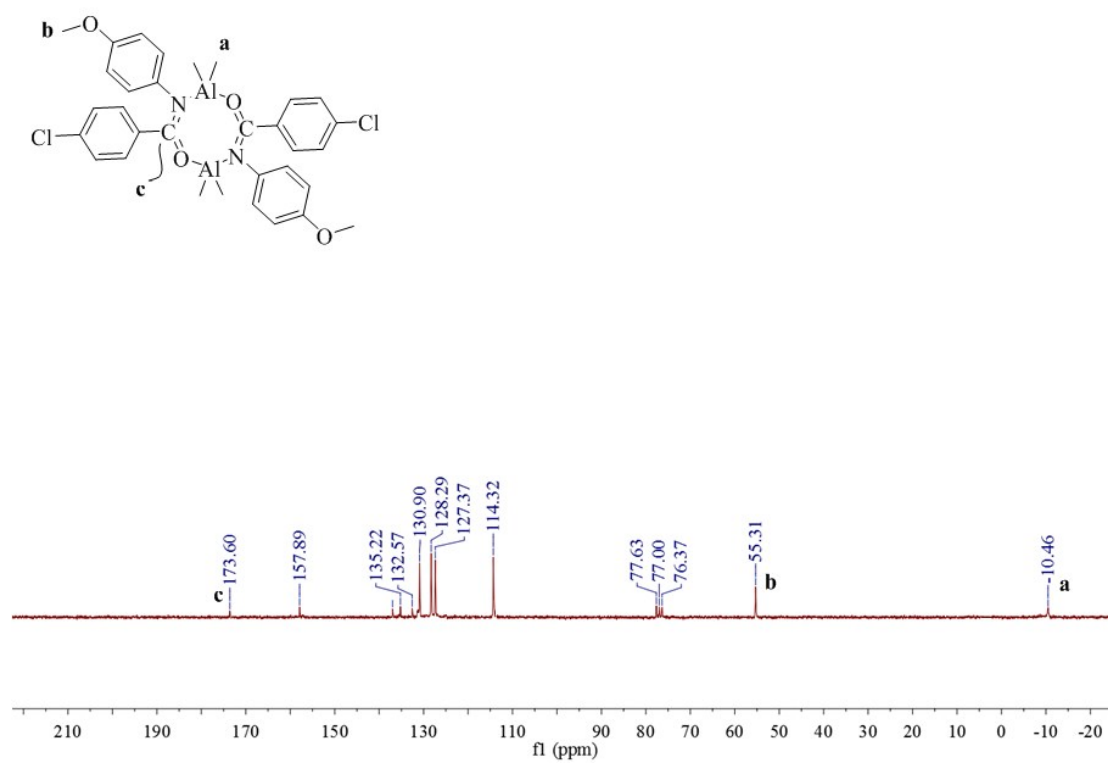

Figure S32 <sup>13</sup>C NMR spectrum of CbOMeAlMe<sub>2</sub> in CDCl<sub>3</sub>

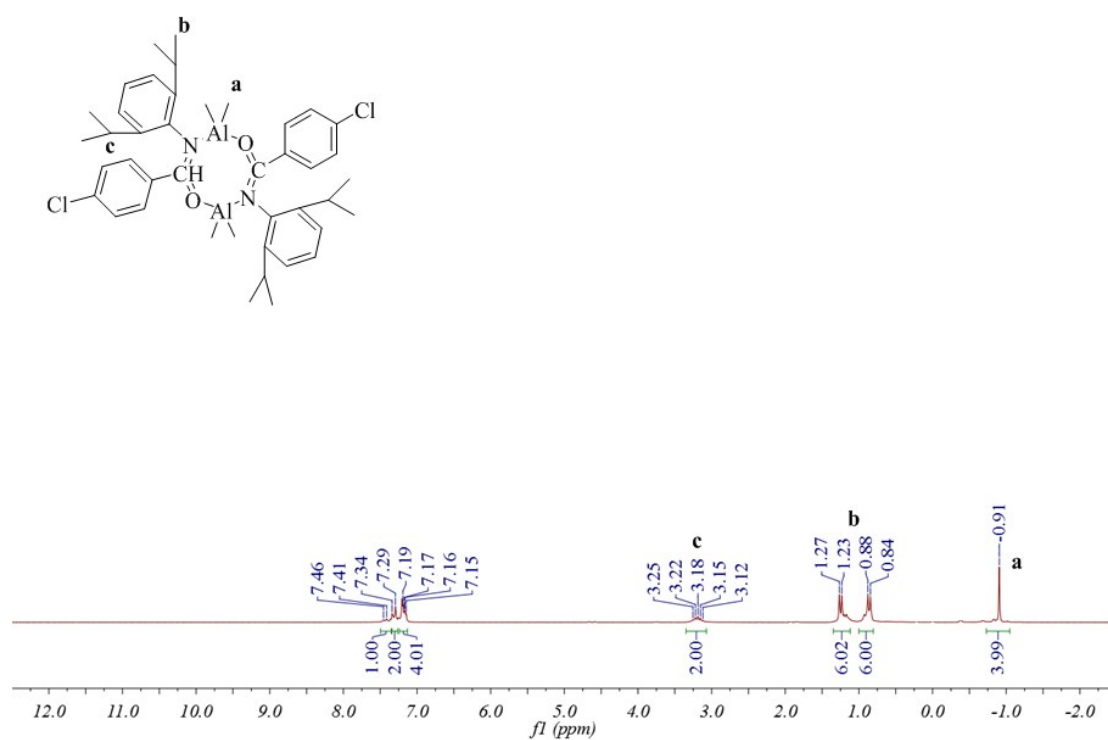

Figure S33 <sup>1</sup>H NMR spectrum of CbiPrAlMe<sub>2</sub> in CDCl<sub>3</sub>

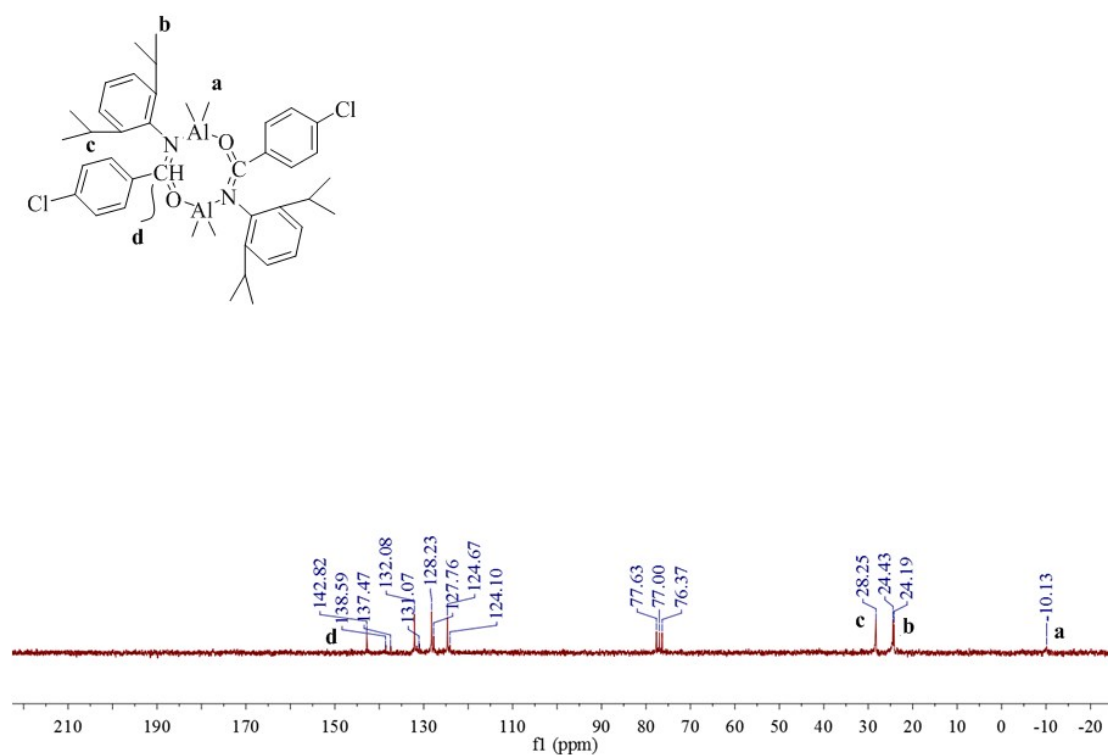

Figure S34 <sup>13</sup>C NMR spectrum of CbiPrAlMe<sub>2</sub> in CDCl<sub>3</sub>

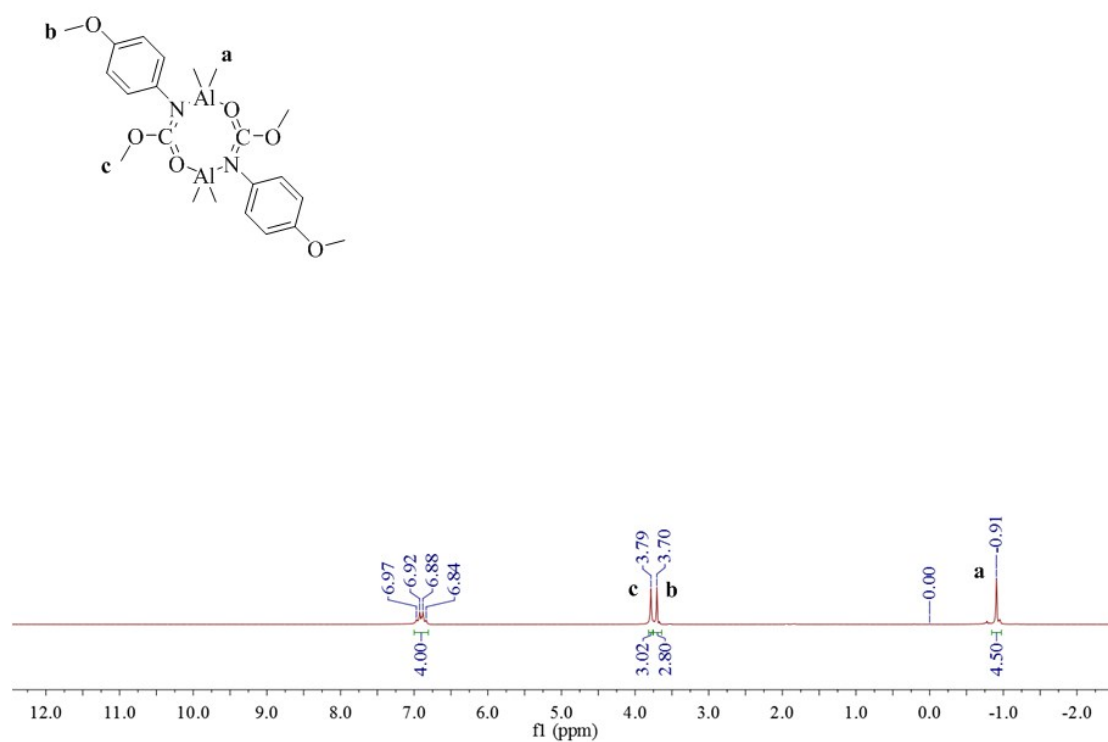

Figure S35 <sup>1</sup>H NMR spectrum of MfOMeAlMe<sub>2</sub> in CDCl<sub>3</sub>

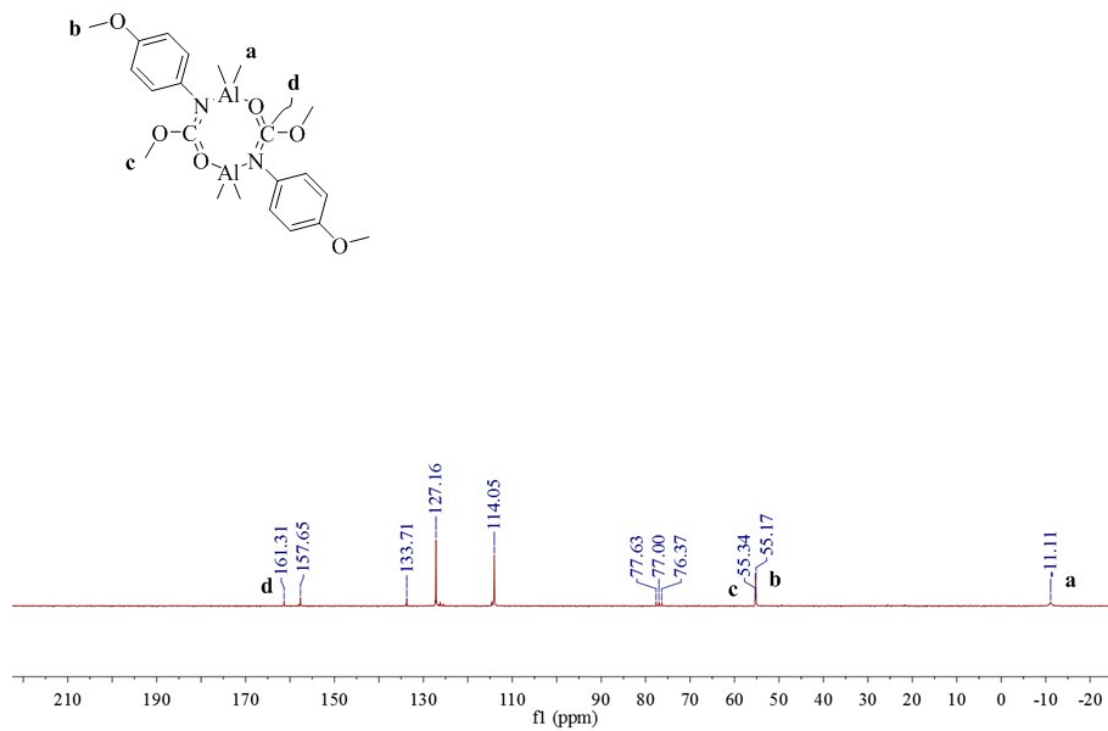

Figure S36 <sup>13</sup>C NMR spectrum of MfOMeAlMe<sub>2</sub> in CDCl<sub>3</sub>

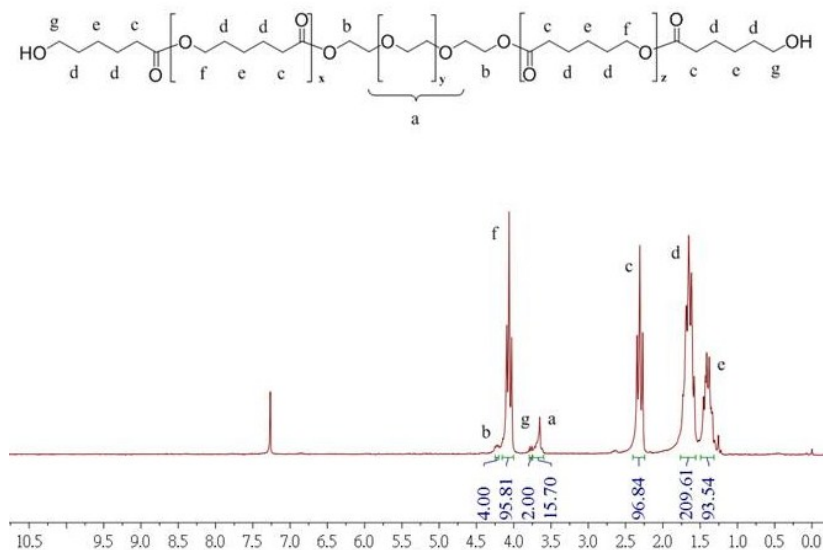

**Figure 37.**  $^1\text{H}$  NMR spectrum of PCL in  $\text{CDCl}_3$  catalyzed by **MfOMeAlMe<sub>2</sub>** with PEG-200 (**Table 3**, entry 1)

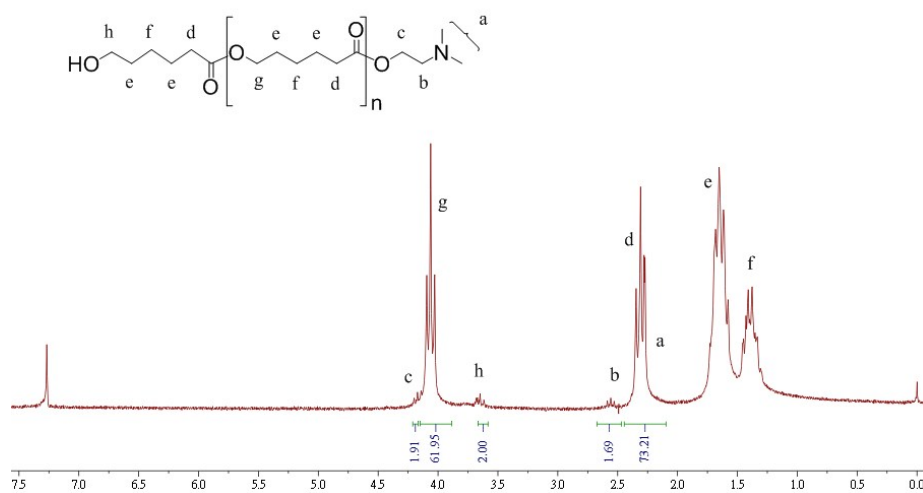

**Figure 38.**  $^1\text{H}$  NMR spectrum of PCL in  $\text{CDCl}_3$  catalyzed by **MfOMeAlMe<sub>2</sub>** with DMAE (**Table 3**, entry 2)

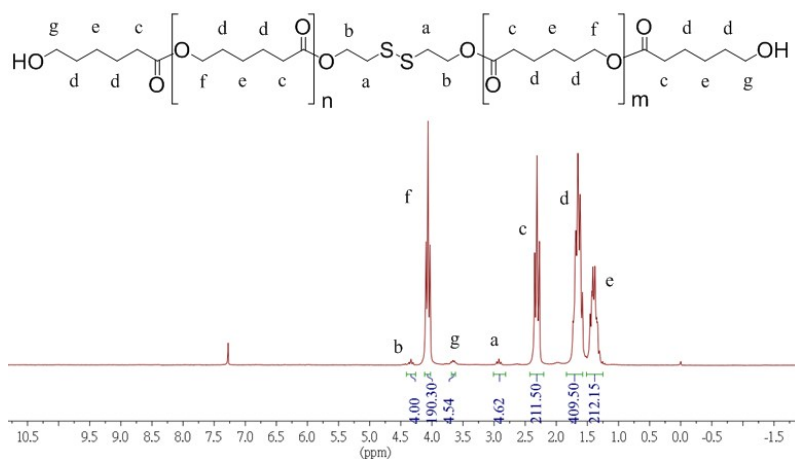

**Figure 39.** <sup>1</sup>H NMR spectrum of PCL in CDCl<sub>3</sub> catalyzed by **MfOMeAlMe<sub>2</sub>** with BHEDS (Table 3, entry 3)

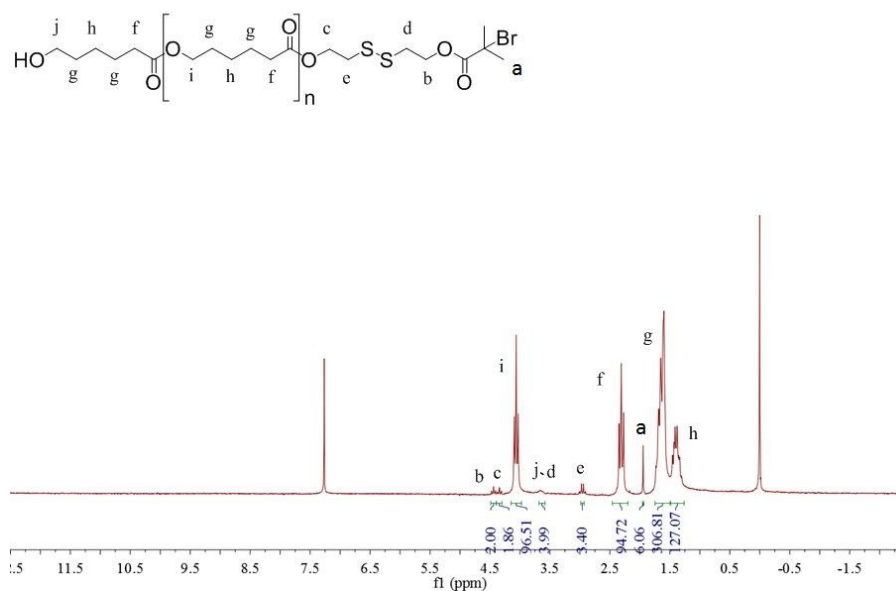

**Figure 40.** <sup>1</sup>H NMR spectrum of PCL in CDCl<sub>3</sub> catalyzed by **MfOMeAlMe<sub>2</sub>** with HOSSBr (Table 3, entry 4)

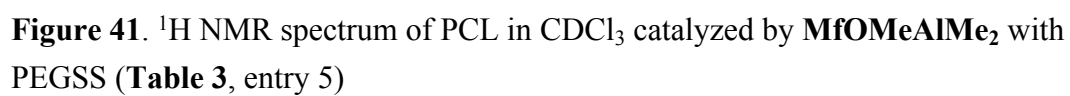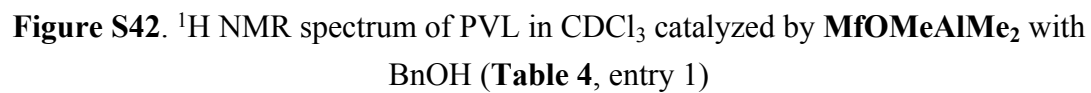



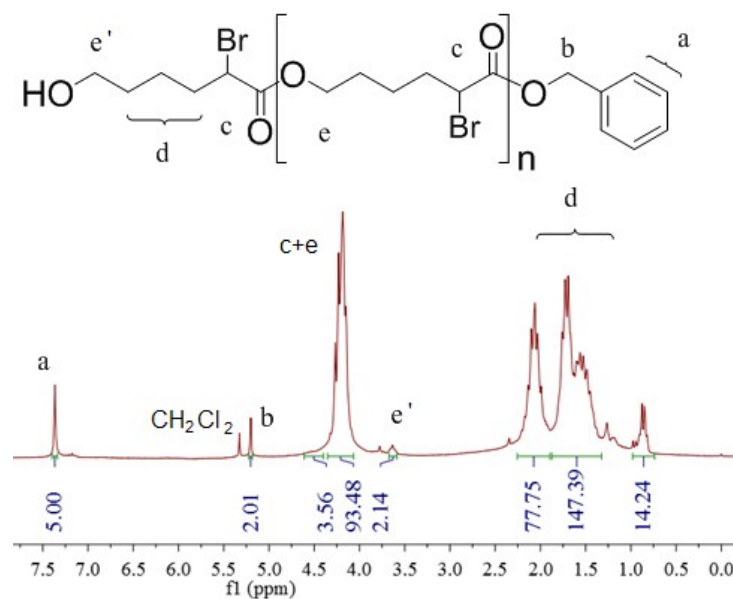

**Figure S43.**  $^1\text{H}$  NMR spectrum of PBrCL in  $\text{CDCl}_3$  catalyzed by  $\text{MfOMeAlMe}_2$  with BnOH (Table 4, entry 2)
